# Supplementary material for: Sonographic Evaluation of the Mechanism of Active Labor (SonoLabor Study): observational study protocol regarding the implementation of the sonopartogram
Source: PubMed Central journal article supplement — BMJ Open. 2021 Sep 7;11(9):e047188. doi: 10.1136/bmjopen-2020-047188 (PMC8424831; doi:10.1136/bmjopen-2020-047188), 2021-09-07
Supplement: bmjopen-2020-047188.draft_revisions.pdf [file bmjopen-2020-047188.draft_revisions.pdf]

# BMJ Open

BMJ Open is committed to open peer review. As part of this commitment we make the peer review history of every article we publish publicly available.

When an article is published we post the peer reviewers' comments and the authors' responses online. We also post the versions of the paper that were used during peer review. These are the versions that the peer review comments apply to.

The versions of the paper that follow are the versions that were submitted during the peer review process. They are not the versions of record or the final published versions. They should not be cited or distributed as the published version of this manuscript.

BMJ Open is an open access journal and the full, final, typeset and author-corrected version of record of the manuscript is available on our site with no access controls, subscription charges or pay-per-view fees (<http://bmjopen.bmj.com>).

If you have any questions on BMJ Open's open peer review process please email [info.bmjopen@bmj.com](mailto:info.bmjopen@bmj.com)

# BMJ Open

## Sonographic Evaluation of the Mechanism of Active Labor (SonoLabor study): observational study protocol regarding the implementation of the sonopartogram

|                               |                                                                                                                                                                                                                                                                                                                                                                                                                                                                                                                                                                                                                                                                                                                                                                                                                                                                                                                                                                                                                                                                                                                                                                                                                                              |
|-------------------------------|----------------------------------------------------------------------------------------------------------------------------------------------------------------------------------------------------------------------------------------------------------------------------------------------------------------------------------------------------------------------------------------------------------------------------------------------------------------------------------------------------------------------------------------------------------------------------------------------------------------------------------------------------------------------------------------------------------------------------------------------------------------------------------------------------------------------------------------------------------------------------------------------------------------------------------------------------------------------------------------------------------------------------------------------------------------------------------------------------------------------------------------------------------------------------------------------------------------------------------------------|
| Journal:                      | <i>BMJ Open</i>                                                                                                                                                                                                                                                                                                                                                                                                                                                                                                                                                                                                                                                                                                                                                                                                                                                                                                                                                                                                                                                                                                                                                                                                                              |
| Manuscript ID                 | bmjopen-2020-047188                                                                                                                                                                                                                                                                                                                                                                                                                                                                                                                                                                                                                                                                                                                                                                                                                                                                                                                                                                                                                                                                                                                                                                                                                          |
| Article Type:                 | Protocol                                                                                                                                                                                                                                                                                                                                                                                                                                                                                                                                                                                                                                                                                                                                                                                                                                                                                                                                                                                                                                                                                                                                                                                                                                     |
| Date Submitted by the Author: | 22-Nov-2020                                                                                                                                                                                                                                                                                                                                                                                                                                                                                                                                                                                                                                                                                                                                                                                                                                                                                                                                                                                                                                                                                                                                                                                                                                  |
| Complete List of Authors:     | <p>Dira, Laurentiu Mihai; University of Medicine and Pharmacy of Craiova, Tudorache, Stefania</p> <p>Antsaklis, Panagiotis; University of Athens, Obstetrics and Gynecology</p> <p>Daskalakis, George; University of Athens, Obstetrics and Gynecology</p> <p>Themistoklis, Dagklis; Aristotle University of Thessaloniki</p> <p>Belciug, Smaranda; University of Craiova</p> <p>Stoean, Ruxandra; University of Craiova</p> <p>Cara, Monica Laura; Universitatea de Medicina si Farmacie din Craiova,</p> <p>Novac, Marius; University of Medicine and Pharmacy of Craiova</p> <p>Dragusin, Roxana; University of Medicine and Pharmacy Craiova, Obstetrics and Gynecology</p> <p>Florea, Maria; University of Medicine and Pharmacy Craiova, Obstetrics and Gynecology</p> <p>Patru, Ciprian; University of Medicine and Pharmacy Craiova, Obstetrics and Gynecology</p> <p>Zorila, Lucian; University of Medicine and Pharmacy Craiova, Obstetrics and Gynecology</p> <p>Nagy, Rodica; Universitatea de Medicina si Farmacie din Craiova</p> <p>Ruican, Dan; Universitatea de Medicina si Farmacie din Craiova</p> <p>Iliescu, Dominic Gabriel; University of Medicine and Pharmacy Craiova, Departament of Obstetrics and Gynecology</p> |
| Keywords:                     | Ultrasonography < OBSTETRICS, Fetal medicine < OBSTETRICS, Maternal medicine < OBSTETRICS                                                                                                                                                                                                                                                                                                                                                                                                                                                                                                                                                                                                                                                                                                                                                                                                                                                                                                                                                                                                                                                                                                                                                    |
|                               |                                                                                                                                                                                                                                                                                                                                                                                                                                                                                                                                                                                                                                                                                                                                                                                                                                                                                                                                                                                                                                                                                                                                                                                                                                              |

SCHOLARONE™  
Manuscripts

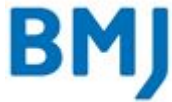

I, the Submitting Author has the right to grant and does grant on behalf of all authors of the Work (as defined in the below author licence), an exclusive licence and/or a non-exclusive licence for contributions from authors who are: i) UK Crown employees; ii) where BMJ has agreed a CC-BY licence shall apply, and/or iii) in accordance with the terms applicable for US Federal Government officers or employees acting as part of their official duties; on a worldwide, perpetual, irrevocable, royalty-free basis to BMJ Publishing Group Ltd ("BMJ") its licensees and where the relevant Journal is co-owned by BMJ to the co-owners of the Journal, to publish the Work in this journal and any other BMJ products and to exploit all rights, as set out in our [licence](#).

The Submitting Author accepts and understands that any supply made under these terms is made by BMJ to the Submitting Author unless you are acting as an employee on behalf of your employer or a postgraduate student of an affiliated institution which is paying any applicable article publishing charge ("APC") for Open Access articles. Where the Submitting Author wishes to make the Work available on an Open Access basis (and intends to pay the relevant APC), the terms of reuse of such Open Access shall be governed by a Creative Commons licence – details of these licences and which [Creative Commons](#) licence will apply to this Work are set out in our licence referred to above.

Other than as permitted in any relevant BMJ Author's Self Archiving Policies, I confirm this Work has not been accepted for publication elsewhere, is not being considered for publication elsewhere and does not duplicate material already published. I confirm all authors consent to publication of this Work and authorise the granting of this licence.

# Sonographic Evaluation of the Mechanism of Active Labor (SonoLabor study): observational study protocol regarding the implementation of the sonopartogram

## Authors, institutions:

Dira Laurentiu<sup>1</sup>, MD, PhD candidate  
Tudorache Stefania<sup>1</sup>, MD, PhD, Associate Professor  
Antsaklis Panagiotis<sup>2</sup>, MD, PhD, Associate Professor  
Daskalakis George<sup>2</sup>, MD, PhD, Associate Professor  
Themistoklis Dagklis<sup>3</sup>, MD, PhD  
Smaranda Belciug<sup>4</sup>, PhD, Associate Professor  
Ruxandra Stoean<sup>4</sup>, PhD, Associate Professor  
Novac Marius<sup>5</sup>, MD, PhD, Lecturer  
Cara Monica – Laura<sup>6</sup>, MD, PhD, Assistant lecturer  
Dragusin Roxana<sup>1</sup>, MD, PhD, Assistant lecturer  
Florea Maria<sup>1</sup>, MD, PhD, Assistant lecturer  
Ciprian Patru<sup>1</sup>, MD, PhD, Lecturer  
Zorila Lucian<sup>1</sup>, MD, PhD, Assistant lecturer  
Nagy Rodica<sup>1</sup>, MD, PhD candidate  
Ruican Dan<sup>1</sup>, MD, PhD candidate  
Iliescu Dominic - Gabriel<sup>1</sup>, MD, PhD, Associate Professor

<sup>1</sup> Department of Obstetrics and Gynecology, University of Medicine and Pharmacy Craiova, University Emergency County Hospital Craiova, Romania

<sup>2</sup> Department of Obstetrics and Gynecology, University of Athens, Alexandra University Hospital, Greece

<sup>3</sup> Department of Obstetrics and Gynecology, Aristotle University of Thessaloniki, Ippokrateion Hospital, Greece

<sup>4</sup> Computer Science Department, University of Craiova, Romania

<sup>5</sup> Department of Intensive care and Anesthesiology, University of Medicine and Pharmacy Craiova, University Emergency County Hospital Craiova, Romania

<sup>6</sup> Department of Public Health, University of Medicine and Pharmacy Craiova, University Emergency County Hospital Craiova, Romania

**Corresponding author:** Cara Monica,  
University of Medicine and Pharmacy Craiova,  
Address: Petru Rares nr.2, Craiova, Dolj, CP: 200349, Romania,  
e-mail: monica-laura.cara@outlook.com,  
tel: 0040723963925,  
fax: 0040251502179

Word count, excluding title page, abstract, references, figures and tables: 4042.

## Abstract

**Methods / Analysis:** This is a prospective observational study performed in three university hospitals, with an unselected population of women admitted in labor at term. Clinical and US evaluations will be performed assessing fetal head position, descent and rotation. Specific US parameters regarding fetal head position, progression and rotation will be recorded so as to develop nomograms in a similar way that partograms were developed. The primary outcome is to develop nomograms for the longitudinal US assessment of labor in unselected nulliparous and multiparous women with occiput anterior position of the fetal head. The secondary aims are to assess the particularities of the sonopartogram in occiput posterior deliveries and to develop standard deviations based on the US pilot study findings. Finally, we will investigate the capability of the US labor monitoring to predict the outcome of delivery.

**Ethics and dissemination:** All protocols and the informed consent form comply with the Health Ministry and professional society ethics guidelines. University Ethics Committees approved the study protocol. The trial results will be published in peer-reviewed journals and at conference presentations. The study will be implemented and reported in line with the STROBE statement.

**Trial registration number:** ClinicalTrials.gov Registry: NCT02326077.

**Keywords:** intrapartum ultrasound, labor monitoring, prenatal diagnosis, fetal medicine, maternal medicine, ultrasonography.

## Strengths and limitations of this study

### Strengths

- The multicentre design on representative population and the blinded clinical / imagistic assessment aims to intercept the potential sources of bias.
- Sonographic and clinical evaluation of the labor progression in any cephalic presentation (not only with occiput anterior position).

### Limitations

- The high number of laboring women necessary to investigate the characteristics of each clinical situation aimed in the study design.
- The concept of normality is population-based and depends on various management attitudes (for example epidural analgesia, active management of labor), different characteristics of the partogram are observed<sup>1</sup> that may affect generalizability.

## Introduction

Studies show that clinical digital pelvic estimations of fetal head position, station and progression in the pelvic canal are poorly reproducible, and therefore unreliable<sup>2-17</sup>. This may have major consequences on the decision of the appropriate delivery mode, because digital examination is less reliable especially in clinical situations when obstetrical interventions are more likely to be needed<sup>7,18-22</sup>. Severe complications may occur secondary to failed instrumental delivery and Caesarean extraction with the fetal head deeply impacted in the maternal pelvis. Many studies provided sonographic data regarding the fetal head descend / progression (FHPr) in the second stage of labor and proposed several easily measurable and reliable parameters, capable to predict the vaginal or operative

1  
2  
3 outcome of the delivery with occiput anterior positions<sup>24-29</sup>. The literature regarding US evaluation in the first stage  
4 of labor is much less, but based on available data US evaluation appears to be useful for the prognosis of labor<sup>30,31</sup>.  
5 Given the increasing evidence regarding the advantages offered by the use of US in labor, our group concluded  
6 that the development of a *sonopartogram*, as an adjuvant to or a replacement of traditional labor monitoring, may  
7 be the answer to many of decision problems on the mode of delivery.<sup>32,33</sup>  
8  
9

10 There is little information in the literature regarding the ultrasonographic monitoring of the entire active labor  
11 mechanism<sup>34-36,42</sup>. A recent proof-of-concept study showed that the sonopartogram is feasible in most cases<sup>34</sup>.  
12 However, a study of the paired clinical and sonographic assessments of labor in a large unselected population has  
13 not yet been conducted. Furthermore, there are no nomograms for the ultrasound monitoring of labor. Nowadays,  
14 the use of ultrasound in labor is generally limited to research settings and a relatively small-number of women has  
15 been studied. Therefore, efforts should be made to describe the value of an objective partogram in practice,  
16 especially because of the important medico-legal liability issues related to labor and delivery.  
17

18 Our study is the first to present a multicentre longitudinal assessment of the mechanism of both stages of active  
19 labor, in a representative population using concomitant blinded clinical and sonographic evaluations in unselected  
20 low-risk parturients at term. The aim of this paper is to describe the protocol of the current study.  
21  
22  
23

## 24 Objectives

25 The primary objective of this study is the development of sono-nomograms for the longitudinal US assessment of  
26 labor in unselected nulliparous and multiparous women at term with occiput anterior position of the fetal head.  
27

28 The secondary objectives of the study are:

- 29 • to compare the US pattern of labor evolution in nulliparous and multiparous women.
- 30 • to study the influence of occiput position, body mass index, parturient age on the mechanism of delivery  
31 evaluated by US.
- 32 • to compare the labor clinical trend from our study data with the Friedman studies<sup>35,36</sup> and other recent  
33 research on the partogram<sup>1</sup>.
- 34 • to compare and correlate the US findings (sonopartogram data) with the classical clinical partogram  
35 parameters.
- 36 • to investigate the correlations between the data of the participating centres.
- 37 • to analyse the temporal variation of the sonographic measurements in spontaneous vaginal delivery  
38 versus obstructed labor in primiparae versus multiparae and in fetuses with occiput anterior versus those  
39 with persistent occiput posterior.
- 40 • to evaluate the capability of the US technique to predict the outcome of delivery.  
41  
42  
43  
44  
45  
46  
47

## 48 Methods and analysis

### 49 Study design and setting

50 This is an observational cohort prospective study, which will take place in three tertiary maternity hospitals  
51 (University Emergency Clinical County Hospital Craiova, Alexandra University Hospital of Athens and Ippokrateion  
52 Hospital Thessaloniki), with more than 4000 deliveries per annum. The study aims to record almost simultaneously  
53 blinded US and clinical features of low-risk women in labor at term, with singleton eutrophic cephalic presentation  
54 pregnancies.  
55  
56  
57  
58  
59  
60

Figure 1

## Participants

All pregnant women admitted in active labor at term are considered eligible for the study. They are included in the study consecutively, depending on the availability of the US operators involved. Cases planned for elective caesarean section, or involving imminent intention to deliver, with non-cephalic presentation, intra-uterine death, multiple pregnancies or resulting neonates weighting less than 2500g or more than 4000g will be excluded from the study. Also, we will exclude women with previous cervical surgery (eg. cone biopsy, cervical cerclage), those younger than 18 years, or those considered in the opinion of the researcher as having language or learning impairment.

Women are defined as being in labor in the presence of regular uterine contractions occurring at a frequency of at least 2 every 10 minutes associated with a cervical dilatation of 3-4 cm or more<sup>39</sup>, regardless of whether they underwent Oxytocin augmentation or epidural anaesthesia.

Gestational age is determined by the last menstrual period if confirmed by early US dating or by the first sonographic evaluation alone if fetal biometry was not consistent with the menstrual dating by more than one week.

## Procedures

### *Recruitment*

During their usual consultation in the labor ward, in an eligible case, the physician on duty provides brief information about the research and invites the patient to take part in the study. If the patient shows interest in the study and meets the inclusion criteria, a face-to-face appointment with the ultrasound operator is arranged. The details of the study and its potential benefits are explained thoroughly to the patient. If the patient agrees to participate in the study, written informed consent is obtained.

### *Interventions*

All pregnant women that meet the inclusion criteria are assessed clinically by the physician on duty. The managing clinician is a senior consultant not involved in the study.

**Clinical examinations** are performed just before the US assessments and recorded as follows (Figure 1):

- cervical dilation in centimetres,
- head station in relation to the ischial spines - to determine FHPr and
- occiput position – to determine fetal head position (FHPo) and occiput rotation during labor. Occiput position was classified as occiput anterior (OA), occiput posterior (OP), left or right occiput transverse (LOT or ROT), left or right occiput anterior (LOA or ROA), or left or right occiput posterior (LOP or ROP)<sup>39,40</sup>.

In women in active labor, transabdominal and transperineal **ultrasound evaluations** are performed by obstetricians with appropriate training in US in labor, with minimum 1 year of experience in the field. Mobile and compact US machines are used: Logic e (GE Healthcare, China), GE Voluson P6, Samsung R7 and ALOKA f31 equipped with 2–5-MHz transabdominal 2D convex transducers.

The following planes are obtained and stored on the system's hard disk drive for off-line analysis (Figure 1):

1. transabdominal suprapubic transverse plane (used for FHPo determination),
2. transabdominal transversal and longitudinal planes (used to determine the spine position),
3. infrapubic or translabial sagittal plane in the in semi-recumbent position, with legs flexed (used to evaluate FHPr parameters),

4. transperineal transverse plane, at the level of the ischial tuberosity, applying firm pressure without creating discomfort, and the transducer moved and angled until the shortest distance to the fetal skull was visualized (used to evaluate the fetal head to perineum distance (HPD)),
5. infrapubic transverse plane (used to visualise the cerebral midline rotation to the antero-posterior axis of the maternal pelvis - rotation angle or midline angle (MLA) in the 2nd stage of labor).

Using the measurement techniques described in the literature, the assessments are performed offline by the respective examiner (Figure 1, 2, 3):

- FHPo parameters (Figure 2): occiput position<sup>6</sup>, midline angle (MLA) in advanced labor<sup>26</sup>. The clinical and US findings of the FHPo are recorded on a data sheet depicting a circle, like a clock, divided into 24 sections, each of 15°. The position of the occiput (OA, OP, LOA, ROA, LOP, ROP) is determined transabdominally in the 1st stage of labor<sup>6</sup> and transperineally<sup>26</sup> in the 2nd stage, measured using the MLA parameter. At the initial assessment, the digital evaluation is considered to be correct if the FHPo was within  $\pm 45^\circ$  of the US determination. Because of ethical issues, the design of the study stated that the attending obstetrician was informed in case of clinical and US discordance when instrumental or operative delivery was attempted.
- FHPr parameters (Figure 3): progression angle (PA)<sup>27,28</sup>, progression distance (PD)<sup>23</sup>, head direction angle (HDA)<sup>23,25</sup> and head to perineum distance (HPD)<sup>41</sup>.
- Cervical dilation is evaluated only clinically, as the evaluation of this parameter is best achieved with digital assessment<sup>42</sup>.
- The caput (Figure 3) is measured as the maximum distance between the leading part of the skull and the fetal skin in the sagittal or transverse planes.
- Moulding (Figure 3) is diagnosed when the skull bones were seen overlapping in the sagittal or transverse planes.

Figure 2

Figure 3

US scans are performed hourly until complete dilation (1st phase of active labor) and at every 15 minutes after complete dilation (2nd phase). The purpose of the apparently high number of examinations was to obtain accurate information in each labor in terms of correlation of FHPr, FHPo and cervical dilatation. In a previous study in our clinic this methodology proved acceptable for the parturients<sup>43</sup>. The frequent evaluations in the second stage are meant to offer a better analysis of this critical stage of labor.

Notation of time delivery is used to calculate the time interval from each scan to delivery.

The sonographer and the clinician are blinded to each other's findings (except FHPo) as the specific measurements are performed afterwards, offline and labor management is conducted by the Labor and Delivery department personnel.

Labor characteristics are recorded: mode and time of delivery, neonatal Apgar score and birth weight, whether labor was spontaneous or induced, use of oxytocin or epidural anaesthesia, occipital position at delivery. Maternal characteristics are retrieved from the hospital records: age, height, weight, ethnicity, parity, gestational age.



1  
2  
3 The US labor assessments should not be biased by confounders that influence the quality of the clinical evaluations  
4 in labor (obesity, anterior placenta, caput, moulding), because the visualization of the fetal skull and pubic  
5 symphysis is easily achievable even in such conditions. To ensure protocol fidelity, all sonographers have  
6 completed an one-day workshop and participated in group supervision sessions that were held weekly in the first  
7 month of the study.  
8

9 The information provided to the clinician regarding the US determination of the FHPo in case of clinical – imagistic  
10 discordance before instrumental or operative delivery, could represent a theoretically bias of the study. However,  
11 many tertiary centres already use the US determination of the FHPo in such situations, and this aspect does not  
12 interfere with the objectives of our study.  
13  
14

## 15 Outcome measures

### 16 *Primary outcome*

17  
18 The primary objective of this study is the elaboration of nomograms for the longitudinal US assessment of labor in  
19 unselected nulliparous and multiparous. The nomograms represent the evolution of the progression markers (PA,  
20 DA, PD, HPD) in relation with time and cervical dilatation.  
21  
22

### 23 *Secondary outcomes*

- 24 • to compare the US pattern of labor evolution in nulliparous and multiparous women.
- 25 • to study the influence of occiput position, body mass index, parturient age on the mechanism of delivery  
26 evaluated by US.
- 27 • to compare the labor clinical trend from our study data with the Friedman studies<sup>35,36</sup> and other recent  
28 research on the partogram<sup>1</sup>.
- 29 • to compare and correlate the US findings (sonopartogram data) with the classical clinical partogram  
30 parameters.
- 31 • to investigate the correlations between the data of the participating centres.
- 32 • to analyse the temporal variation of the sonographic measurements in spontaneous vaginal delivery  
33 versus obstructed labor in primiparae versus multiparae and in fetuses with occiput anterior versus those  
34 with persistent occiput posterior.
- 35 • to evaluate the capability of the US technique to predict the outcome of delivery.  
36  
37  
38  
39  
40  
41

## 42 Data collection and management, Quality control

43 To ensure the acquisition of accurate data and for study monitoring purposes, the following procedures are  
44 followed:  
45

- 46 • The initial workshop established standardised procedures regarding data collection, encoding of the  
47 clinical and ultrasound data and electronic storage;
- 48 • The principal investigators held training sessions to provide instructions on the protocol and study  
49 procedures for the sonographers at the beginning of the study;
- 50 • Periodic meetings are held with study site personnel, in order to discuss issues related to the conduct of  
51 the study;
- 52 • The principal investigators in the three centres are available for consultation by telephone at request;
- 53 • Interim analyses monthly - the data manager evaluates the data with the statistics personnel and conducts  
54 a quality review of the database. The results of the interim analyses are discussed between the principal  
55 investigators, who decide whether to continue, stop, or modify the trial.  
56  
57  
58  
59  
60

## Statistical methods

### *Sample size estimation*

Although several studies have investigated the clinical course of labor, until present we do not have data regarding the nomograms for US evolution of labor. The number of patients enrolled in the clinical partogram studies varies widely. However, the Friedman's study that still serves as the basis of how most physicians define normal labor, enrolled 500 primiparous at term<sup>37,38</sup>. On the other hand, we have a recent large, but retrospective study that analysed the clinical labor records of more than 62,000 women from 19 hospitals across the U.S. and concluded that these criteria created 50 years ago may no longer be applicable to contemporary obstetric populations and for current obstetric management<sup>1</sup>.

Regarding imaging studies, the prospective researches on the trend of the labor progress using intrapartum transperineal US, gathered less than 100 cases each<sup>34,36,44</sup>.

The primary outcome of our study will be centile charts for each US progression marker in relation to time. Our statistical goal was that the sample size should be large enough to yield precise estimates predictions of extreme centiles. We estimate the sample size in relation to the precision and accuracy of a single centile and regression based reference limits<sup>45,46</sup>.

According to previously published studies the overall rate of occiput posterior deliveries in nulliparous is around 7.2%, whereas for the multiparous deliveries the rate is around 4%. A suitable statistical power (two-tailed type of null hypothesis with default statistical power goals  $P \geq 95\%$  and type I error  $\alpha = 0.05$  level of significance) can be achieved if we have at least 102 patients in the case of nulliparous deliveries, and 57 multiparous deliveries, respectively, with occiput anterior positions.

Such population groups are not achievable during our present research. However, we hope that the publication of our protocol and the preliminary results with preliminary standard deviation results will trigger and help similar studies and a meta-analysis that will achieve the necessary size for this purpose.

### *Statistical analysis*

The statistical analyses will be performed by IBM SPSS Statistics for Windows, Version 22.0. (Armonk, NY: IBM Corp.).

Descriptive statistics will be produced for all study variables (mother's age, height, weight, parity, gestational age, neonatal Apgar score and birth weight, mode and time of delivery, whether labor was spontaneous or induced, use of oxytocin or epidural anaesthesia, occiput position, progression angle, progression distance, head direction angle, head to perineum distance). Continuous variables will be presented as the mean and standard deviation (SD) or mean (95% confidence intervals). Categorical data will be presented as frequency and percentage.

Data will be first tested for normality and equal variance. The maternal, labor, and neonatal characteristics of women will be compared using  $\chi^2$ , Fisher exact test, and the Wilcoxon rank sum test where applicable.

Pearson's correlations and regressions will be used for the evaluation of correlation between ultrasound parameters and between US and time to delivery and digital vaginal examination for various clinical situations (nulliparous and multiparous, fetuses with OA and those with persistent OP position). Reference ranges (90% range between 5th and 95th centiles) and the 95% confidence interval will be constructed for each ultrasound parameter and displayed in graphic form. Predictive ability of the nomogram will be assessed by calculating sensitivity, specificity, positive predictive value, negative predictive value and likelihood ratio, by plotting receiver-operating characteristics (ROC) curve.

1  
2  
3 To identify factors that predict spontaneous or obstructed labor, all analyses will use appropriate (that is, logistic or  
4 linear) regression models, with results presented as point estimates (odds ratios or difference in means), 95%  
5 confidence intervals and p values. Further secondary analyses will involve planned subgroup analyses and will use  
6 multivariable regression models. In all models, predictors will be selected for inclusion in stepwise regression.  
7 Based on the probabilities predicted by the logistic models, receiver operating characteristic (ROC) curves will be  
8 constructed and we will calculate and report the area under the curve, sensitivity and specificity rates with 95%  
9 confidence interval in predicting mode of delivery.  
10  
11

12 The induction–delivery interval within 24 hours will be evaluated using Kaplan–Meier survival analyses and Cox  
13 regression analyses. Women undergoing a Cesarean section or if time to delivery is more than 24 hours are  
14 excluded. In the Cox regression analyses, fetal head–perineum distance, occiput position and parity will be tested  
15 as possible predictive factors. In additional analyses, we will adjust for maternal age, BMI, gestational age, and  
16 birth weight as possible confounders.  
17  
18  
19

## 20 Reporting of adverse events

21 Prenatal ultrasonography appears to be a safe investigation method, as until today there has been no study  
22 reported suggesting otherwise (Statement approved by the International Society of Ultrasound in Obstetrics and  
23 Gynecology (ISUOG) Board in September 2011 and by the World Federation of Ultrasound in Medicine and Biology  
24 (WFUMB) Council in August 2011)<sup>47</sup>. US is routinely used in everyday clinical practise for assessment of neonates,  
25 including cranial and cerebral examination. However US involves energy exposure and that requires further  
26 investigation.  
27  
28  
29

30 Regarding the perception of laboring women about US there have been no reports in the literature of US causing  
31 discomfort.  
32

33 All adverse events reported spontaneously by patients or observed by the obstetricians will be recorded. When an  
34 adverse event occurs, the treating physician will take all necessary and appropriate measures to ensure the safety  
35 of the patient.  
36  
37  
38

## 39 Ethical considerations and dissemination

40 Ethics approval of the study protocol was obtained from the Ethics Committees of the universities in the three  
41 centres. The trial is registered in the ClinicalTrials.gov Registry: NCT02326077.  
42  
43

### 44 *Informed consent*

45 The US operator on duty is responsible for explaining the procedure to the participants and for obtaining an  
46 informed written consent from all women accepting to take part in the study.  
47  
48

49 Regarding the unforeseen complications or health damage that may occur during or after labor, the management  
50 of labor and delivery is made exclusively based on the traditional clinical evaluation, by senior physicians. The US  
51 study protocol is only observational, without any obstruction for the clinical manoeuvres. On the other hand, it is  
52 made clear to all participants that US is considered safe in the third trimester and after birth, both for the mother  
53 and the baby.  
54  
55

### 56 *Compensation and insurance for harmed patients*

57 There will be no special financial compensation; however, any negligence on the part of the physician may be  
58 covered by the doctors' liability insurance.  
59  
60

### *Declaration of interests*

The investigators do not have any financial and other competing interests nor any relationships with companies that may have a financial interest in the information obtained during the study. All investigators comply with the policy on conflicts of interest in research and relevant conflict of interest guidelines.

### *Dissemination*

The results of the study will be disseminated at national and international research conferences and as published articles in peer-reviewed journals. The study will be implemented and reported in line with the STROBE statement.

## Discussion

It has been widely shown before that despite the significant progress in the last decades in maternal-fetal medicine, labor management remained unchanged, based on traditional clinical “blind” evaluations (Leopold manoeuvres, digital clinical evaluation) which have been proved by many studies to be subjective and inexact. In our view, clinical skills should not be abandoned and ultrasonography should only complement clinical examination and not replace it. However, nowadays more than ever, an objective method of assessing labor is needed, given the rates of fetal and maternal trauma at birth and because of the increasing amount of medico-legal liability issues related to labor and delivery. The SonoLabor study aims to provide new objective evidence regarding the evaluation of the mechanism of labor with US.

The SonoLabor study differs from previous studies as it aims to assess all stages of labor, rather than just the second stage of labor in order to elaborate nomograms for the longitudinal US assessment of labor in unselected low-risk population, an important issue of the future sonopartograms. We identified only one pilot study in the literature that aimed to assess the application of sonopartogram<sup>34</sup>. A unique point of our protocol is the comparative evaluation of the US parameters for various clinical situations. This may facilitate the use of different nomograms in labor, adapted to the clinical characteristics of the laboring woman. Another strength of our study is the multicentre design that is useful to achieve a proper study size and also an opportunity to compare the data recorded in different settings.

Although published six decades ago, Friedman’s curve remains the only method for routine labor management today. Clinical studies showed that the pattern of labor progression and the present characteristics of the partogram differ significantly from the traditional Friedman curve<sup>1</sup>. Therefore, our study aims to develop curves for labor monitoring which will be not only objective, but also but also adapted to contemporary practice.

The challenge and limitation of this study is the achievement of a sufficient study size for the secondary objectives of the research. In order to produce specific sonopartograms regarding the maternal characteristics and occiput position, an important number of patients would be required, that is not achievable during our present research. However, preliminary data will be published on this matter. We also hope that the dissemination of our study protocol will serve to future larger studies that will help to collect or complete the necessary data.

We are also aware that the participating sites in this study have certain experience in the intrapartum US assessment. Thus, the results might not be generalizable to other settings. Nevertheless, previous research demonstrated that intrapartum US is reproducible<sup>48</sup> and the learning curve is much easier for US than clinical examination, even for younger and less experienced colleagues<sup>49</sup>. The results of the current study will hopefully

1  
2  
3 improve the evidence-based understanding of the mechanism of labor and establish an objective solution for the  
4 labor monitoring, complementary to the traditional clinical examination.  
5

### 6 **Ethics approval and consent to participate**

7  
8 Ethics approval of the study protocol was obtained from the Ethics Committees of the universities in the three  
9 centres. The trial is registered in the ClinicalTrials.gov Registry: NCT02326077.  
10

#### 11 *Informed consent*

12 The US operator on duty is responsible for explaining the procedure to the participants and for obtaining an  
13 informed written consent from all women accepting to take part in the study.  
14

15  
16 Regarding the unforeseen complications or health damage that may occur during or after labor, the management  
17 of labor and delivery is made exclusively based on the traditional clinical evaluation, by senior physicians. The US  
18 study protocol is only observational, without any obstruction for the clinical manoeuvres. On the other hand, it is  
19 made clear to all participants that US is considered safe in the third trimester and after birth, both for the mother  
20 and the baby.  
21  
22

### 23 **Availability of data and material (Dissemination)**

24 The results of the study will be disseminated at national and international research conferences and as published  
25 articles in peer-reviewed journals. The study will be implemented and reported in line with the STROBE statement.  
26  
27

### 28 **Competing interests**

29 The authors and their relations have no financial connections with companies that may have an interest in the  
30 submitted work, and no non-financial interests that may be relevant to the article.  
31  
32

### 33 **Funding**

34 The potential funding sources will play no role in data collection, analysis and interpretation, in the writing of the  
35 reports, or the decision to submit the paper for publication.  
36  
37

### 38 **Authors' contributions**

39 ID, AP and TS conceived and designed the study and supervise the study implementation. ID and TS drafted  
40 the protocol of the study. CN, NL, CD and AA revised and refined the study protocol and study implementation and  
41 provided final approval of the version to be published. CM provided methodological and statistical expertise and  
42 conducts the statistical analysis. ID and AD drafted a post PhD salary grant proposal that was accepted. DR, CO,  
43 FM, CP, ZL and GD are responsible for study management, staff training, and supervision. ID and AP are the  
44 directors of the two sites and provided clinical expertise and on-site management of the study. All authors critically  
45 reviewed and approved the final version of the manuscript.  
46  
47

### 48 **Acknowledgements**

49 The authors would like to thank to our study sites for their support.  
50  
51

### 52 **Current study status**

53 The SonoLabor study recruited patients during January - December 2016 for a pilot study of 168 deliveries. Data  
54 analysis was completed in January 2017 and the results were communicated at the 27th World Congress on  
55 Ultrasound in Obstetrics and Gynecology<sup>33</sup>. Then the project was discontinued, due to the lack of resources.  
56  
57  
58  
59  
60

## Competing interests

The authors and their relations have no financial connections with companies that may have an interest in the submitted work, and no non-financial interests that may be relevant to the article.

## Details of ethics approval

Ethics Research Committees of University of Medicine and Pharmacy and University of Athens approved the study protocol. Women will provide written consent.

## References

1. Zhang J, Troendle JF, Yancey MK. Reassessing the Labor Curve in Nulliparous Women. *American Journal of Obstetrics and Gynecology*. 2002;187(4):824-828.
2. Rayburn WF, Siemers KH, Legino LJ, Nability MR, Anderson JC, Patil KD. Dystocia in late labor: determining fetal position by clinical and ultrasonic techniques. *Am J Perinatol*. 1989;6(3):316-9.
3. Kreiser D, Schiff E, Lipitz S, Kayam Z, Avraham A, Achiron R. Determination of fetal occiput position by ultrasound during the second stage of labor. *J Matern Fetal Med*. 2001;10(4):283-6.
4. Sherer DM, Miodovnik M, Bradley KS, Langer O. Intrapartum fetal head position I: comparison between transvaginal digital examination and transabdominal ultrasound assessment during the active stage of labor. *Ultrasound Obstet Gynecol*. 2002;19(3):258-63.
5. Sherer DM, Miodovnik M, Bradley KS, Langer O. Intrapartum fetal head position II: comparison between transvaginal digital examination and transabdominal ultrasound assessment during the second stage of labor. *Ultrasound Obstet Gynecol*. 2002;19(3):264-8.
6. Akmal S, Tsoi E, Kametas N, Howard R, Nicolaides KH. Intrapartum sonography to determine fetal head position. *J Matern Fetal Neonatal Med*. 2002;12(3):172-7.
7. Souka AP, Haritos T, Basayiannis K, Noikokyri N, Antsaklis A. Intrapartum ultrasound for the examination of the fetal head position in normal and obstructed labor. *J Matern Fetal Neonatal Med*. 2003;13(1):59-63.
8. Sherer DM, Abulafia O. Intrapartum assessment of fetal head engagement: comparison between transvaginal digital and transabdominal ultrasound determinations. *Ultrasound Obstet Gynecol*. 2003;21(5):430-6.
9. Chou MR, Kreiser D, Taslimi MM, Druzin ML, El-Sayed YY. Vaginal versus ultrasound examination of fetal occiput position during the second stage of labor. *Am J Obstet Gynecol*. 2004;191(2):521-4.
10. Akmal S, Tsoi E, Nicolaides KH. Intrapartum sonography to determine fetal occipital position: interobserver agreement. *Ultrasound Obstet Gynecol*. 2004;24(4):421-4.
11. Dupuis O, Ruimark S, Corinne D, Simone T, André D, René-Charles R. Fetal head position during the second stage of labor: comparison of digital vaginal examination and transabdominal ultrasonographic examination. *Eur J Obstet Gynecol Reprod Biol*. 2005, 1;123(2):193-7.
12. Oláh KS. Reversal of the decision for caesarean section in the second stage of labor on the basis of consultant vaginal assessment. *J Obstet Gynaecol*. 2005;25(2):115-6.
13. Dupuis O, Silveira R, Zentner A, Dittmar A, Gaucherand P, Cucherat M, Redarce T, Rudigoz RC. Birth simulator: reliability of transvaginal assessment of fetal head station as defined by the American College of Obstetricians and Gynecologists classification. *Am J Obstet Gynecol*. 2005;192(3):868-74.
14. Buchmann E, Libhaber E. Interobserver agreement in intrapartum estimation of fetal head station. *Int J Gynaecol Obstet*. 2008;101(3):285-9.

15. Nizard J, Haberman S, Paltieli Y, Gonen R, Ohel G, Le Bourthe Y, Ville Y. Determination of fetal head station and position during labor: a new technique that combines ultrasound and a position-tracking system. *Am J Obstet Gynecol.* 2009;200(4):404.e1-5.
16. Molina FS, Terra R, Carrillo MP, Puertas A, Nicolaides KH. What is the most reliable ultrasound parameter for assessment of fetal head descent? *Ultrasound Obstet Gynecol.* 2010;36(4):493-9.
17. Tutschek B, Torkildsen EA, Eggebø TM. Comparison between ultrasound parameters and clinical examination to assess fetal head station in labor. *Ultrasound Obstet Gynecol.* 2013;41(4):425-9.
18. Akmal S, Kametas N, Tsoi E, Hargreaves C, Nicolaides KH. Comparison of transvaginal digital examination with intrapartum sonography to determine fetal head position before instrumental delivery. *Ultrasound Obstet Gynecol.* 2003;21(5):437-40.
19. Wong GY, Mok YM, Wong SF. Transabdominal ultrasound assessment of the fetal head and the accuracy of vacuum cup application. *Int J Gynaecol Obstet.* 2007;98(2):120-3.
20. Barbera AF, Imani F, Becker T, Lezotte DC, Hobbins JC. Anatomic relationship between the pubic symphysis and ischial spines and its clinical significance in the assessment of fetal head engagement and station during labor. *Ultrasound Obstet Gynecol.* 2009;33(3):320-5.
21. Ramphul M, Ooi PV, Burke G, Kennelly MM, Said SA, Montgomery AA, Murphy DJ. Instrumental delivery and ultrasound: a multicentre randomised controlled trial of ultrasound assessment of the fetal head position versus standard care as an approach to prevent morbidity at instrumental delivery. *BJOG.* 2014 Jul;121(8):1029-38.
22. Ramphul M, Kennelly M, Murphy DJ. Establishing the accuracy and acceptability of abdominal ultrasound to define the foetal head position in the second stage of labour: a validation study. *Eur J Obstet Gynecol Reprod Biol.* 2012 Sep;164(1):35-9.
23. Dietz HP, Lanzarone V. Measuring engagement of the fetal head: validity and reproducibility of a new ultrasound technique. *Ultrasound Obstet Gynecol.* 2005;25(2):165-8.
24. Henrich W, Dudenhausen J, Fuchs I, Kämena A, Tutschek B. Intrapartum translabial ultrasound (ITU): sonographic landmarks and correlation with successful vacuum extraction. *Ultrasound Obstet Gynecol.* 2006;28(6):753-60.
25. Iliescu DG, Adam G, Tudorache S, Antsaklis P, Cernea N. Quantification of fetal head direction using transperineal ultrasound: an easier approach. *Ultrasound Obstet Gynecol.* 2012 Nov;40(5):607-8.
26. Ghi T, Farina A, Pedrazzi A, Rizzo N, Pelusi G, Pilu G. Diagnosis of station and rotation of the fetal head in the second stage of labor with intrapartum translabial ultrasound. *Ultrasound Obstet Gynecol.* 2009;33(3):331-6.
27. Barbera AF, Pombar X, Perugino G, Lezotte DC, Hobbins JC. A new method to assess fetal head descent in labor with transperineal ultrasound. *Ultrasound Obstet Gynecol.* 2009;33(3):313-9.
28. Kalache KD, Dückelmann AM, Michaelis SA, Lange J, Cichon G, Dudenhausen JW. Transperineal ultrasound imaging in prolonged second stage of labor with occipitoanterior presenting fetuses: how well does the 'angle of progression' predict the mode of delivery? *Ultrasound Obstet Gynecol.* 2009;33(3):326-30.
29. Youssef A, Maroni E, Ragusa A, De Musso F, Salsi G, Iammarino MT, Paccapelo A, Rizzo N, Pilu G, Ghi T. Fetal head-symphysis distance: a simple and reliable ultrasound index of fetal head station in labor. *Ultrasound Obstet Gynecol.* 2013;41(4):419-24.
30. Torkildsen EA, Salvesen KÅ, Eggebø TM. Prediction of delivery mode with transperineal ultrasound in women with prolonged first stage of labor. *Ultrasound Obstet Gynecol.* 2011;37(6):702-8.

- 1
  - 2
  - 3
  - 4
  - 5
  - 6
  - 7
  - 8
  - 9
  - 10
  - 11
  - 12
  - 13
  - 14
  - 15
  - 16
  - 17
  - 18
  - 19
  - 20
  - 21
  - 22
  - 23
  - 24
  - 25
  - 26
  - 27
  - 28
  - 29
  - 30
  - 31
  - 32
  - 33
  - 34
  - 35
  - 36
  - 37
  - 38
  - 39
  - 40
  - 41
  - 42
  - 43
  - 44
  - 45
  - 46
  - 47
  - 48
  - 49
  - 50
  - 51
  - 52
  - 53
  - 54
  - 55
  - 56
  - 57
  - 58
  - 59
  - 60
31. Eggebø TM, Hassan WA, Salvesen KÅ, Lindtjørn E, Lees CC. Sonographic prediction of vaginal delivery in prolonged labor: a two-center study. *Ultrasound Obstet Gynecol.* 2014;43(2):195-201.
32. Iliescu D, Antsaklis P, Paulescu D, Comanescu A, Tudorache S, Antsaklis A, Ceausu I, Novac L, Cernea N, Kurjak A. Applications of ultrasound in prelabor and labor. *Donald School J Obstet Gynecol,* 2012, 6(3): 257-269
33. Iliescu DG, Tudorache S, Cernea N, Florea M, Capitanescu R, Novac M, Stoean R, Stoean C, Antsaklis P, Carbutaru O, Dragusin R. P13.03: Correlations of the sonopartogram with classic clinical partogram and key points from a pilot study, *Ultrasound in Obstetrics & Gynecology* 2017; 50 (Suppl. 1):194-195
34. Hassan WA, Eggebø T, Ferguson M, Gillett A, Studd J, Pasupathy D, Lees CC. The sonopartogram: a novel method for recording progress of labor by ultrasound. *Ultrasound Obstet Gynecol.* 2014;43(2):189-94.
35. Eggebø TM. Ultrasound is the future diagnostic tool in active labor. *Ultrasound Obstet Gynecol.* 2013;41(4):361-3.
36. Ghi T, Maroni E, Youssef A, Morselli-Labate AM, Paccapelo A, Montaguti E, Rizzo N, Pilu G. Sonographic pattern of fetal head descent: relationship with duration of active second stage of labor and occiput position at delivery. *Ultrasound Obstet Gynecol.* 2014 Jul;44(1):82-9.
37. Friedman EA. Primigravid labor; a graphicostatistical analysis. *Obstet Gynecol.* 1955 Dec;6(6):567-89.
38. Friedman EA. The graphic analysis of labor. *Am J Obstet Gynecol.* 1954; 68:1568-75
39. Cunningham FG, Leveno KJ, Bloom SL, Hauth JC, Gilstrap LC III, Wenstrom KD (eds). Normal labor and delivery. In *Williams Obstetrics* (22nd ed). McGraw-Hill: 2005; 409-441.
40. Murphy DJ, Burke G, Montgomery AA, Ramphul M; IDUS Study Group. Study protocol. IDUS - Instrumental delivery & ultrasound: a multi-centre randomised controlled trial of ultrasound assessment of the fetal head position versus standard care as an approach to prevent morbidity at instrumental delivery. *BMC Pregnancy Childbirth.* 2012 Sep 13;12:95.
41. Eggebø TM, Gjessing LK, Heien C, Smedvig E, Økland I, Romundstad P, Salvesen KA. Prediction of labor and delivery by transperineal ultrasound in pregnancies with prelabor rupture of membranes at term. *Ultrasound Obstet Gynecol.* 2006;27(4):387-91.
42. Eggebø TM, Økland I, Heien C, Gjessing LK, Romundstad P, Salvesen KA. Can ultrasound measurements replace digitally assessed elements of the Bishop score? *Acta Obstet Gynecol Scand.* 2009;88(3):325-31.
43. Acceptability of Intrapartum Ultrasound Monitoring- Experience from a Romanian Longitudinal Study. D.G. Iliescu, S Tudorache, M.L. Cara, R. Dragusin, O. Carbutaru, M. Florea, C. Patru, L. Zorila, N.A. Dragoescu, L. Novac, N. Cernea. *Current Health Sciences Journal, Volume 41 Issue 4 2015, 355-360.*
44. Tutschek B, Braun T, Chantraine F, Henrich W. A study of progress of labor using intrapartum translabial ultrasound, assessing head station, direction, and angle of descent. *BJOG.* 2011 Jan;118(1):62-9.
45. Royston P. Constructing time-specific reference ranges. *Stat Med* 1991; 10:675-90.
46. Bellera CA, Hanley JA. A method is presented to plan the required sample size when estimating regression-based reference limits *J Clin Epidemiol* 2007; 60:610-5.
47. Bioeffects and Safety Committee, Salvesen K, Lees C, Abramowicz J, Brezinka C, Ter Haar G, Maršál K; Board of the International Society of Ultrasound in Obstetrics and Gynecology (ISUOG). ISUOG-WFUMB statement on the non-medical use of ultrasound, 2011. *Ultrasound Obstet Gynecol.* 2011 Nov;38(5):608.
48. Molina FS, Terra R, Carrillo MP, Puertas A, Nicolaidis KH. What is the most reliable ultrasound parameter for assessment of fetal head descent? *Ultrasound Obstet Gynecol.* 2010 Oct;36(4):493-9.



1  
2  
3  
4  
5  
6  
7  
8  
9  
10  
11  
12  
13  
14  
15  
16  
17  
18  
19  
20  
21  
22  
23  
24  
25  
26  
27  
28  
29  
30  
31  
32  
33  
34  
35  
36  
37  
38  
39  
40  
41  
42  
43  
44  
45  
46  
47  
48  
49  
50  
51  
52  
53  
54  
55  
56  
57  
58  
59  
60

49. Rozenberg P, Porcher R, Salomon LJ, Boirot F, Morin C, Ville Y. Comparison of the learning curves of digital examination and transabdominal sonography for the determination of fetal head position during labor. *Ultrasound Obstet Gynecol.* 2008 Mar;31(3):332-7.

For peer review only

1  
2  
3  
4 Figure 1. Implementation of the SONOLABOR study.  
5  
6

7 Figure 2. Ultrasound determination of the foetal head position and rotation.

8 A: Example of the orientation of the probe in the transabdominal suprapubic transverse plane. B: FHPo  
9 determination in the plane described in image A. C: Orientation of the probe placed above the perineum for  
10 the infrapubic transverse plane acquisition. D: Visualization of the cerebral midline in relation with the antero-  
11 posterior axis of the maternal pelvis and the measurement of rotation angle or midline angle (MLA).  
12  
13 OA, occiput anterior; OP, occiput posterior, LOT, left occiput transverse; ROT, right occiput transverse; LOA  
14 left occiput anterior; ROA right occiput anterior; LOP, left occiput posterior; ROP, right occiput posterior.  
15  
16  
17  
18

19 Figure 3. Ultrasound determination of the foetal head progression in the infrapubic translabial sagittal plane  
20 (A-C), and infrapubic transversal plane (D), caput and molding (E, F). A: measurement of the progression  
21 angle between the long axis of the pubic symphysis and a line extending from its most inferior portion  
22 tangentially to the fetal skull. B: measurement of the direction angle as the angle between the major  
23 longitudinal axis of fetal head (perpendicular to the biparietal diameter) and the infrapubic line. C:  
24 measurement of the progression distance as the minimal distance between the infrapubic line and the  
25 leading part of the fetal skull. D: measurement of the head to perineum distance as the shortest distance  
26 from the skin surface of the perineum to the outer bony limit of the fetal skull. E: caput (star), with the correct  
27 measurement of the progression angle marked in blue, tangent to the foetal calvaria and not to the skin. F:  
28  
29 moulding of the cranial bones, marked with arrow.  
30  
31  
32  
33  
34  
35  
36  
37  
38  
39  
40  
41  
42  
43  
44  
45  
46  
47  
48  
49  
50  
51  
52  
53  
54  
55  
56  
57  
58  
59  
60

1  
2  
3  
4  
5  
6  
7  
8  
9  
10  
11  
12  
13  
14  
15  
16  
17  
18  
19  
20  
21  
22  
23  
24  
25  
26  
27  
28  
29  
30  
31  
32  
33  
34  
35  
36  
37  
38  
39  
40  
41  
42  
43  
44  
45  
46  
47  
48  
49  
50  
51  
52  
53  
54  
55  
56  
57  
58  
59  
60

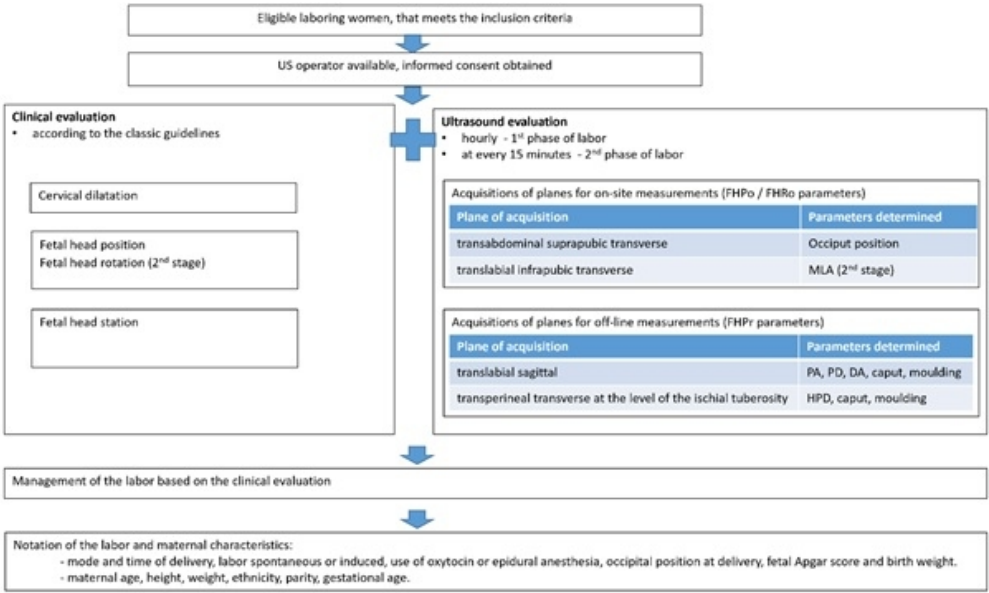

Implementation of the SONOLABOR study.

51x31mm (300 x 300 DPI)

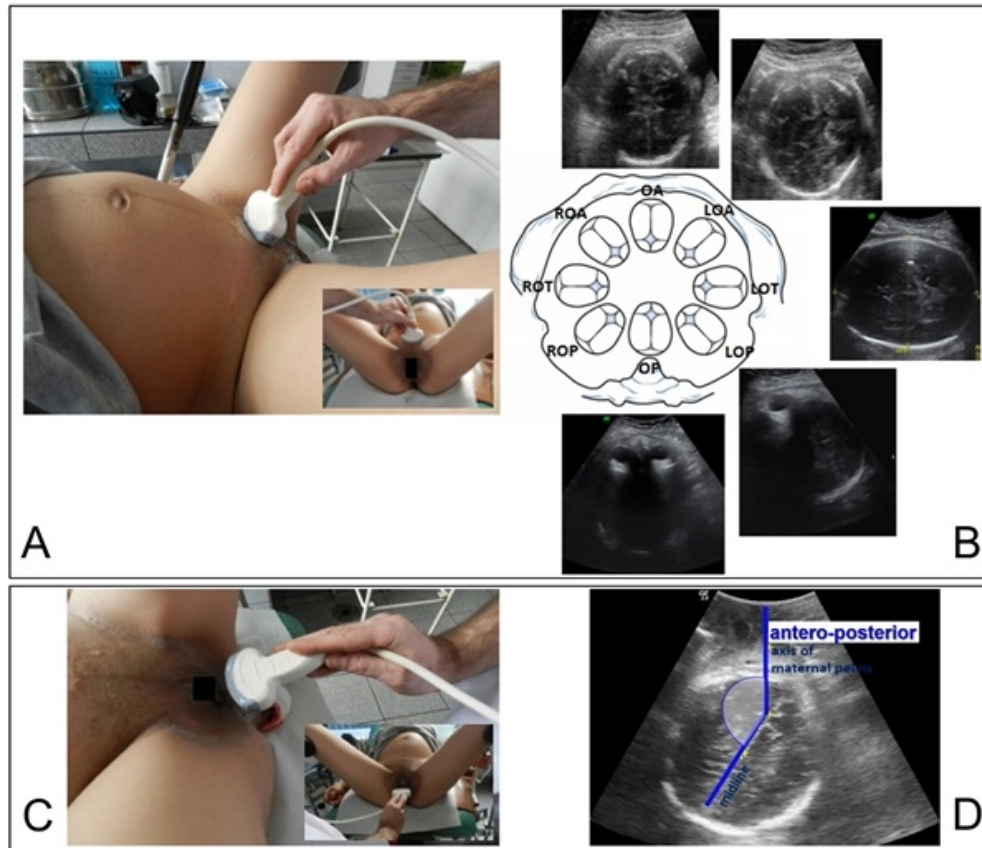

Figure 2. Ultrasound determination of the foetal head position and rotation.

A: Example of the orientation of the probe in the transabdominal suprapubic transverse plane. B: FHPo determination in the plane described in image A. C: Orientation of the probe placed above the perineum for the infrapubic transverse plane acquisition. D: Visualization of the cerebral midline in relation with the antero-posterior axis of the maternal pelvis and the measurement of rotation angle or midline angle (MLA). OA, occiput anterior; OP, occiput posterior, LOT, left occiput transverse; ROT, right occiput transverse; LOA left occiput anterior; ROA right occiput anterior; LOP, left occiput posterior; ROP, right occiput posterior.

51x43mm (300 x 300 DPI)

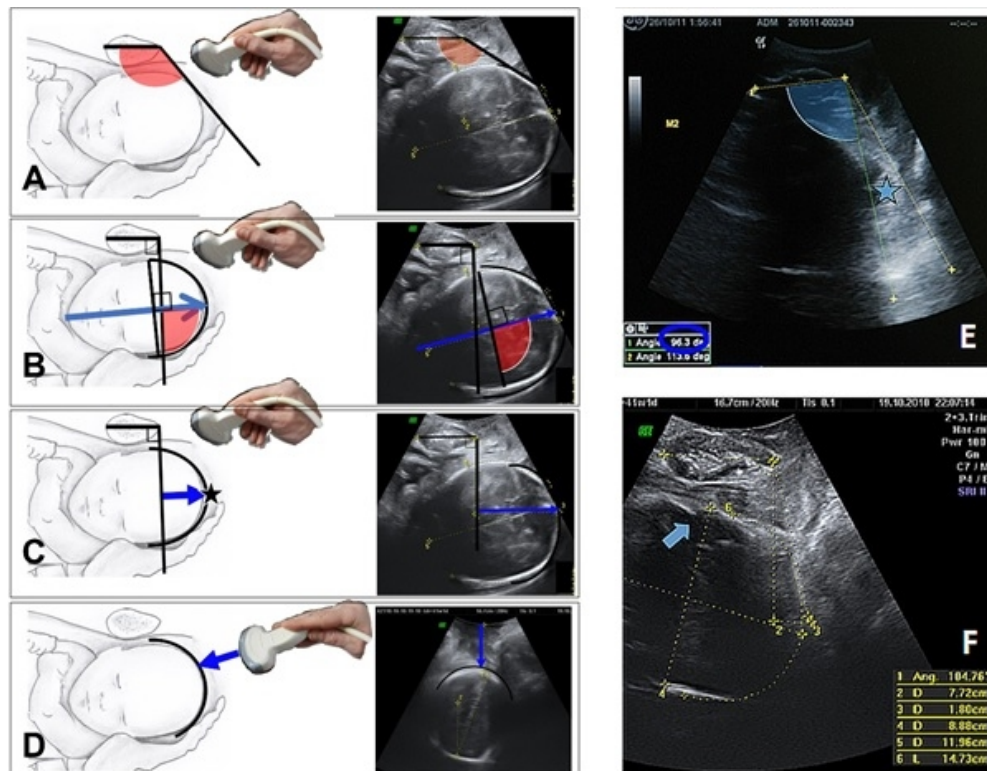

Figure 3. Ultrasound determination of the foetal head progression in the infrapubic translabial sagittal plane (A-C), and infrapubic transversal plane (D), caput and molding (E, F). A: measurement of the progression angle between the long axis of the pubic symphysis and a line extending from its most inferior portion tangentially to the fetal skull. B: measurement of the direction angle as the angle between the major longitudinal axis of fetal head (perpendicular to the biparietal diameter) and the infrapubic line. C: measurement of the progression distance as the minimal distance between the infrapubic line and the leading part of the fetal skull. D: measurement of the head to perineum distance as the shortest distance from the skin surface of the perineum to the outer bony limit of the fetal skull. E: caput (star), with the correct measurement of the progression angle marked in blue, tangent to the foetal calvaria and not to the skin. F: moulding of the cranial bones, marked with arrow.

51x39mm (300 x 300 DPI)

# BMJ Open

## Sonographic Evaluation of the Mechanism of Active Labor (SonoLabor study): observational study protocol regarding the implementation of the sonopartogram

|                                 |                                                                                                                                                                                                                                                                                                                                                                                                                                                                                                                                                                                                                                                                                                                                                                                                                                                                                                                                                                                                                                                                                                                                                                                                                                                                                                                              |
|---------------------------------|------------------------------------------------------------------------------------------------------------------------------------------------------------------------------------------------------------------------------------------------------------------------------------------------------------------------------------------------------------------------------------------------------------------------------------------------------------------------------------------------------------------------------------------------------------------------------------------------------------------------------------------------------------------------------------------------------------------------------------------------------------------------------------------------------------------------------------------------------------------------------------------------------------------------------------------------------------------------------------------------------------------------------------------------------------------------------------------------------------------------------------------------------------------------------------------------------------------------------------------------------------------------------------------------------------------------------|
| Journal:                        | <i>BMJ Open</i>                                                                                                                                                                                                                                                                                                                                                                                                                                                                                                                                                                                                                                                                                                                                                                                                                                                                                                                                                                                                                                                                                                                                                                                                                                                                                                              |
| Manuscript ID                   | bmjopen-2020-047188.R1                                                                                                                                                                                                                                                                                                                                                                                                                                                                                                                                                                                                                                                                                                                                                                                                                                                                                                                                                                                                                                                                                                                                                                                                                                                                                                       |
| Article Type:                   | Protocol                                                                                                                                                                                                                                                                                                                                                                                                                                                                                                                                                                                                                                                                                                                                                                                                                                                                                                                                                                                                                                                                                                                                                                                                                                                                                                                     |
| Date Submitted by the Author:   | 07-May-2021                                                                                                                                                                                                                                                                                                                                                                                                                                                                                                                                                                                                                                                                                                                                                                                                                                                                                                                                                                                                                                                                                                                                                                                                                                                                                                                  |
| Complete List of Authors:       | <p>Dira, Laurentiu Mihai; University of Medicine and Pharmacy of Craiova, Tudorache, Stefania; University of Medicine and Pharmacy of Craiova, Obstetrics and Gynecology</p> <p>Antsaklis, Panagiotis; University of Athens, Obstetrics and Gynecology</p> <p>Daskalakis, George; University of Athens, Obstetrics and Gynecology</p> <p>Themistoklis, Dagklis; Aristotle University of Thessaloniki</p> <p>Belciug, Smaranda; University of Craiova</p> <p>Stoean, Ruxandra; University of Craiova</p> <p>Novac, Marius; University of Medicine and Pharmacy of Craiova</p> <p>Cara, Monica Laura; University of Medicine and Pharmacy of Craiova</p> <p>Dragusin, Roxana; University of Medicine and Pharmacy of Craiova, Obstetrics and Gynecology</p> <p>Florea, Maria; University of Medicine and Pharmacy of Craiova, Obstetrics and Gynecology</p> <p>Patru, Ciprian; University of Medicine and Pharmacy of Craiova, Obstetrics and Gynecology</p> <p>Zorila, Lucian; University of Medicine and Pharmacy of Craiova, Obstetrics and Gynecology</p> <p>Nagy, Rodica; University of Medicine and Pharmacy of Craiova</p> <p>Ruican, Dan; University of Medicine and Pharmacy of Craiova</p> <p>Iliescu, Dominic Gabriel; University of Medicine and Pharmacy of Craiova, Departament of Obstetrics and Gynecology</p> |
| <b>Primary Subject Heading</b>: | Obstetrics and gynaecology                                                                                                                                                                                                                                                                                                                                                                                                                                                                                                                                                                                                                                                                                                                                                                                                                                                                                                                                                                                                                                                                                                                                                                                                                                                                                                   |
| Secondary Subject Heading:      | Diagnostics                                                                                                                                                                                                                                                                                                                                                                                                                                                                                                                                                                                                                                                                                                                                                                                                                                                                                                                                                                                                                                                                                                                                                                                                                                                                                                                  |
| Keywords:                       | Ultrasonography < OBSTETRICS, Fetal medicine < OBSTETRICS, Maternal medicine < OBSTETRICS                                                                                                                                                                                                                                                                                                                                                                                                                                                                                                                                                                                                                                                                                                                                                                                                                                                                                                                                                                                                                                                                                                                                                                                                                                    |
|                                 |                                                                                                                                                                                                                                                                                                                                                                                                                                                                                                                                                                                                                                                                                                                                                                                                                                                                                                                                                                                                                                                                                                                                                                                                                                                                                                                              |

SCHOLARONE™  
Manuscripts



I, the Submitting Author has the right to grant and does grant on behalf of all authors of the Work (as defined in the below author licence), an exclusive licence and/or a non-exclusive licence for contributions from authors who are: i) UK Crown employees; ii) where BMJ has agreed a CC-BY licence shall apply, and/or iii) in accordance with the terms applicable for US Federal Government officers or employees acting as part of their official duties; on a worldwide, perpetual, irrevocable, royalty-free basis to BMJ Publishing Group Ltd ("BMJ") its licensees and where the relevant Journal is co-owned by BMJ to the co-owners of the Journal, to publish the Work in this journal and any other BMJ products and to exploit all rights, as set out in our [licence](#).

The Submitting Author accepts and understands that any supply made under these terms is made by BMJ to the Submitting Author unless you are acting as an employee on behalf of your employer or a postgraduate student of an affiliated institution which is paying any applicable article publishing charge ("APC") for Open Access articles. Where the Submitting Author wishes to make the Work available on an Open Access basis (and intends to pay the relevant APC), the terms of reuse of such Open Access shall be governed by a Creative Commons licence – details of these licences and which [Creative Commons](#) licence will apply to this Work are set out in our licence referred to above.

Other than as permitted in any relevant BMJ Author's Self Archiving Policies, I confirm this Work has not been accepted for publication elsewhere, is not being considered for publication elsewhere and does not duplicate material already published. I confirm all authors consent to publication of this Work and authorise the granting of this licence.

# Sonographic Evaluation of the Mechanism of Active Labor (SonoLabor study): observational study protocol regarding the implementation of the sonopartogram

## Authors, institutions :

Dira Laurentiu<sup>1</sup>, MD, PhD candidate  
Tudorache Stefania<sup>1</sup>, MD, PhD, Associate Professor  
Antsaklis Panagiotis<sup>2</sup>, MD, PhD, Associate Professor  
Daskalakis George<sup>2</sup>, MD, PhD, Associate Professor  
Themistoklis Dagklis<sup>3</sup>, MD, PhD  
Belciug Smaranda<sup>4</sup>, PhD, Associate Professor  
Stoian Ruxandra<sup>4</sup>, PhD, Associate Professor  
Novac Marius<sup>5</sup>, MD, PhD, Lecturer  
Cara Monica – Laura<sup>6</sup>, MD, PhD, Assistant lecturer  
Dragusin Roxana<sup>1</sup>, MD, PhD, Assistant lecturer  
Florea Maria<sup>1</sup>, MD, PhD, Assistant lecturer  
Patru Ciprian<sup>1</sup>, MD, PhD, Lecturer  
Zorila Lucian<sup>1</sup>, MD, PhD, Assistant lecturer  
Nagy Rodica<sup>1</sup>, MD, PhD candidate  
Ruican Dan<sup>1</sup>, MD, PhD candidate  
Iliescu Dominic - Gabriel<sup>1</sup>, MD, PhD, Associate Professor

<sup>1</sup> Department of Obstetrics and Gynecology, University of Medicine and Pharmacy Craiova, University Emergency County Hospital Craiova, Romania

<sup>2</sup> Department of Obstetrics and Gynecology, University of Athens, Alexandra University Hospital, Greece

<sup>3</sup> Department of Obstetrics and Gynecology, Aristotle University of Thessaloniki, Ippokrateion Hospital, Greece

<sup>4</sup> Computer Science Department, University of Craiova, Romania

<sup>5</sup> Department of Intensive care and Anesthesiology, University of Medicine and Pharmacy Craiova, University Emergency County Hospital Craiova, Romania

<sup>6</sup> Department of Public Health, University of Medicine and Pharmacy Craiova, University Emergency County Hospital Craiova, Romania

**Corresponding author:** Cara Monica,  
University of Medicine and Pharmacy Craiova,  
Address: Petru Rares nr.2, Craiova, Dolj, CP: 200349, Romania,  
e-mail: monica-laura.cara@outlook.com,  
tel: 0040723963925,  
fax: 0040251502179

Word count, excluding title page, abstract, references, figures and tables: 4586



# Abstract

## Introduction

Over the last decades, a large body of literature have shown that intrapartum clinical digital pelvic estimations of fetal head position, station and progression in the pelvic canal are less accurate, compared to US scan. Given the increasing evidence regarding the advantages of using US to evaluate the mechanism of labor, our study protocol aims to develop sonopartograms for fetal cephalic presentations. They will allow for a more objective evaluation of labor progression than the traditional labor monitoring, which could enable more rapid decisions regarding the mode of delivery.

**Methods / Analysis:** This is a prospective observational study performed in three university hospitals, with an unselected population of women admitted in labor at term. Both clinical and US evaluations will be performed assessing fetal head position, descent and rotation. Specific US parameters regarding fetal head position, progression and rotation will be recorded to develop nomograms in a similar way that partograms were developed. The primary outcome is to develop nomograms for the longitudinal US assessment of labor in unselected nulliparous and multiparous women with fetal cephalic presentation. The secondary aims are to assess the sonopartogram differences in occiput anterior and posterior deliveries, to compare the labor trend from our research with the classic and other recent partogram models and to investigate the capability of the US labor monitoring to predict the outcome of spontaneous vaginal delivery.

**Ethics and dissemination:** All protocols and the informed consent form comply with the Ministry of Health and the professional society ethics guidelines. University Ethics Committee approved the study protocol. The trial results will be published in peer-reviewed journals and at the conferences presentations. The study will be implemented and reported in line with the STROBE statement.

**Trial registration number:** ClinicalTrials.gov Registry: NCT02326077.

**Keywords:** intrapartum ultrasound, labor monitoring, prenatal diagnosis, fetal medicine, maternal medicine, ultrasonography.

## Strengths and limitations of this study

### Strengths

- The multicentre design on representative population and the blinded clinical / ultrasound assessment aims to intercept the potential sources of bias.
- Sonographic and clinical evaluation of the labor progression in any cephalic presentation (not only with occiput anterior position).

### Limitations

- The high number of laboring women needed to investigate the characteristics of each clinical situation targeted in the study design.
- The concept of normality is population-based and depends on various management attitudes (for example epidural analgesia, active management of labor), different characteristics of the partogram are observed that may affect generalizability.

## Introduction

Over the last decades, a large body of literature have shown that clinical digital pelvic estimations of fetal head position, station and progression in the pelvic canal are not accurate during the first<sup>1</sup> and second stage of labor<sup>1-6</sup>, poorly reproducible when compared to US<sup>7-9</sup>, poorly reliable<sup>10-12</sup>, experience-dependent<sup>1,4</sup> and often inexact in challenging labor circumstances, such as: prolonged first stage of labor<sup>13</sup>, cases with arrested cervical dilation<sup>14</sup>, obstructed labor<sup>15</sup>, fetal head engagement<sup>10,16</sup>, posterior and transverse occiput locations<sup>6,14</sup>, or caput<sup>4</sup>. This may imply significant consequences on the decision of the appropriate delivery mode, because digital examination is less reliable especially when obstetrical interventions are more likely to be needed<sup>15,17-21</sup>. Previous studies that used sonographic evaluation in prolonged labor cases have demonstrated the potential to decrease the rate of late Cesarean extractions, and the various approaches proposed in the literature were considered by our study design. Many studies provided sonographic data regarding the fetal head descent / progression (FHPr) in the second stage of labor and proposed several easily measurable and reliable parameters, capable to predict the vaginal or operative outcome of the delivery with occiput anterior positions<sup>22-28</sup>. The literature regarding US evaluation in the first stage of labor is lesser, but based on available data US evaluation appears to be useful for the prognosis of labor<sup>29,30,31</sup>.

Given the increasing evidence regarding the advantages offered by using US in labor, our group concluded that the development of a *sonopartogram*, as an adjuvant to or a replacement of traditional labor monitoring, provides the setting for a more objective evaluation of labor progression, which could enable more rapid decisions regarding the mode of delivery<sup>32,33</sup>.

There is few information in the literature regarding the ultrasonographic monitoring of the entire active labor mechanism<sup>34-36</sup>. A recent proof-of-concept study showed that the sonopartogram is feasible in most cases<sup>34</sup>. However, a study of the paired clinical and sonographic assessments of labor in a large, unselected population has not yet been conducted. Furthermore, there are no nomograms for the ultrasound monitoring of labor. Nowadays, the use of ultrasound in labor is generally limited to research settings and a relatively small number of women has been studied. Therefore, efforts should be made to describe the value of an objective partogram in practice, especially because of the important medico-legal liability issues related to labor and delivery.

This study is designed to produce an original multicentre longitudinal assessment of the mechanism of active labor, including both stages, in a representative population, using concomitant blinded clinical and sonographic evaluations in unselected low-risk parturient women at term. The aim of this paper is to describe the protocol of the study.

## Objectives

The primary objective of this study is the development of sono-nomograms for the longitudinal US assessment of labor in unselected nulliparous and multiparous women at term with fetal cephalic presentation.

The secondary objectives of the study are:

- to compare the US pattern of labor evolution in nulliparous and multiparous women.
- to study the influence of occiput position, body mass index, parturient age on the mechanism of delivery evaluated by US.
- to compare the labor trend from our study with the Friedman studies<sup>37,38</sup> and other recent research on the partogram<sup>39</sup>.
- to compare and correlate the US findings (sonopartogram data) with the classical clinical partogram parameters regarding the fetal head position and descent during active labor
- to investigate the correlations between the data of the participating centres.

- to analyse the temporal variation of the sonographic measurements in spontaneous vaginal delivery versus obstructed labor in primiparae versus multiparae and in fetuses with occiput anterior versus those with persistent occiput posterior.
- to evaluate the capability of the US technique to predict the outcome of vaginal delivery.

## Methods and analysis

### Study design and setting

This is an observational cohort prospective study, which will take place in three tertiary maternity hospitals (University Emergency County Hospital Craiova, Alexandra University Hospital of Athens and Ippokrateion Hospital Thessaloniki), with more than 4000 deliveries per annum. The study aims to record simultaneously the labor progress by clinical and US evaluations in low-risk women in labor at term, with singleton cephalic presentation.

### Patient and Public Involvement

We conducted a previous study<sup>40</sup> during the development of this research question, where we evaluated the acceptability of the method and found that the vast majority of laboring women (98%) agree with the supplementary US investigation protocol and the demographic characteristics did not influence the rate of acceptance. Most of the women (93% of accepters and 75% of decliners) had little difficulty deciding whether or not to have the scan protocol. All women who were scanned during labor found it an acceptable experience, and only 21% of women without epidural anesthesia rated the perceived difficulty as "mild" or "discomforting". Women rated having the intrapartum scan as being significantly less difficult than having a cervical smear, transvaginal scan or having a digital clinical evaluation. Two-thirds (67%) of the patients expressed increased confidence while being able to follow along the medical personnel the fetal head progression on the ultrasound screen. Almost all of the consenting women (97%) who had the intrapartum US scans and all the 4 decliners said they would definitely or probably agree such ultrasound monitoring in a future labor, if this technique is proven useful for the labor outcome.

### Participants

All pregnant women admitted in active labor at term are considered eligible for the study. They will be included in the study consecutively, depending on the availability of the US operators involved. Cases planned for elective caesarean section, or involving imminent intention to deliver, with non-cephalic presentation, intra-uterine death, multiple pregnancies or resulting neonates weighting less than 2500g or more than 4000g will be excluded from the study. Also, we will exclude women with previous cervical surgery (e.g. cone biopsy, cervical cerclage), those younger than 18 years, or those considered in the opinion of the researcher as having language or learning impairment.

Women will be admitted in the first stage of labor when there are regular painful contractions and there is a progressive cervical dilatation from 4 cm, and the second stage will be established based on the finding of full dilatation of the cervix<sup>41</sup> regardless of whether the parturients underwent artificial rupture of the membranes, Oxytocin augmentation or epidural anaesthesia.

Gestational age will be determined by the last menstrual period in women with regular menses, confirmed with US dating, preferably during the first trimester. If the first trimester biometry is not consistent with the menstrual dating by more than one week, gestational age will be established based on the sonographic evaluation alone. In women with irregular menses, the gestational age will be determined solely based on the first fetal biometry evaluation in pregnancy.

## Procedures

### *Recruitment*

During their usual consultation in the labor ward, in an eligible case, the physician on duty provides brief information about the research and invites the patient to take part in the study. If the patient shows interest in the study and meets the inclusion criteria, a face-to-face appointment with the ultrasound operator is arranged. The details of the study and the potential benefits that may result following the completion of the objectives will be explained thoroughly to the patient. The only direct benefit of the laboring women that participate in the study would be the communication between the obstetrician and sonographer regarding fetal head position when instrumental delivery is attempted, as presented in the Interventions section. If the patient agrees to participate in the study, written informed consent will be obtained.

### *Interventions*

All pregnant women that meet the inclusion criteria will be assessed clinically by the physician on duty. The managing clinician is a senior consultant not involved in the study.

**Clinical examinations** will take place in women in active labor just before the US assessments (Figure 1). The clinician will note the observations on a specially designed partogram-like sheet that will be used for women in labor who agree to participate in the study. The following labor characteristics has to be noted before US assessment:

- **cervical dilation** in centimetres,
- **fetal head descent or progression (FHPr)** – determined by the evaluation of head station in relation to the ischial spines,
- **fetal head position (FHPO)** – the evaluation of occiput position in both stages and rotation in the second stage. Occiput position will be classified as occiput anterior (OA), occiput posterior (OP), left or right occiput transverse (LOT or ROT), left or right occiput anterior (LOA or ROA), or left or right occiput posterior (LOP or ROP)<sup>5,42</sup>.
- Presence of **caput** and / or **molding**, with the approximate diameter.

Clinical examination will be followed by transabdominal and transperineal **ultrasound evaluations** conducted by obstetricians with appropriate training in US in labor, with minimum 1 year of experience in the field. Mobile and compact US machines will be used: Logic e (GE Healthcare, China), GE Voluson P6, Samsung R7, BenQ T3300 and ALOKA f31 equipped with 2–5 and 2-6 MHz 2D convex transducers.

The objectives of US evaluations are like those of clinical assessment, and aimed to record the mechanism of labor by specific measurements. In Table 1 we present the sonographic measurements, in relation to the acquisition planes and the features of labor mechanism that are involved. The respective images will be stored on the system's hard disk drive for off-line analysis and measurements that will be performed according to the techniques described in the literature, by the sonographer who performed the evaluation.

Table 1. Acquisition of US planes, and ultrasound measurements performed offline, according previous literature

| Labor mechanism feature                                | Acquisition plane                          | Ultrasound measurements                                                         |
|--------------------------------------------------------|--------------------------------------------|---------------------------------------------------------------------------------|
| Fetal head position (FHPO) in the first stage of labor | Transabdominal suprapubic transverse plane | <ul style="list-style-type: none"> <li>• Occiput position (Figure 2)</li> </ul> |

|                                                                                      |                                                                                                                                                                                                                                          |                                                                                                                                                                                                                                                                                                                                                                                                                                                                                           |
|--------------------------------------------------------------------------------------|------------------------------------------------------------------------------------------------------------------------------------------------------------------------------------------------------------------------------------------|-------------------------------------------------------------------------------------------------------------------------------------------------------------------------------------------------------------------------------------------------------------------------------------------------------------------------------------------------------------------------------------------------------------------------------------------------------------------------------------------|
|                                                                                      |                                                                                                                                                                                                                                          | Both clinical and US findings of the FHPo are recorded on a data sheet depicting a circle, like a clock, divided into 24 sections, each of 15°, and the position of the occiput is assigned as anterior (OA), posterior (OP), left anterior (LOA), right anterior (ROA), left posterior (LOP), right posterior (ROP), right transverse (ROT), left transverse (LOT) <sup>5,42</sup>                                                                                                       |
| Fetal head position (FHPo) in the second stage of labor, evaluation of head rotation | Transperineal infrapubic transverse plane (Figure 3), with visualization of the cerebral midline                                                                                                                                         | <ul style="list-style-type: none"> <li>• Occiput position</li> <li>• Midline angle (MLA) (Figure 3)</li> </ul> <p>The position of the occiput (OA, OP, LOA, ROA, LOP, ROP) is determined in a similar fashion transperineally in the 2<sup>nd</sup> stage of labor.</p> <p>Midline angle (MLA) is calculated<sup>25</sup> based on the visualization of the cerebral midline in relation to the antero-posterior axis of the maternal pelvis - rotation angle or midline angle (MLA).</p> |
| Fetal head descent / progression (FHPr)                                              | Transperineal translabial sagittal plane                                                                                                                                                                                                 | <ul style="list-style-type: none"> <li>• Progression angle (PA)<sup>26,27</sup>,</li> <li>• Progression distance (PD)<sup>22</sup>,</li> <li>• Head direction angle (HDA)<sup>23,24</sup> (Figure 4).</li> </ul>                                                                                                                                                                                                                                                                          |
|                                                                                      | Transperineal translabial transverse plane, at the level of the ischial tuberosity, applying firm pressure without creating discomfort, and the transducer moved and angled until the shortest distance to the fetal skull is visualized | <ul style="list-style-type: none"> <li>• Head to perineum distance (HPD)<sup>43</sup> (Figure 4).</li> </ul>                                                                                                                                                                                                                                                                                                                                                                              |
| Caput and molding                                                                    | Transperineal sagittal and transverse plane                                                                                                                                                                                              | <ul style="list-style-type: none"> <li>• Caput (Figure 5) is measured as the maximum distance between the leading part of the skull and the fetal skin in the sagittal or transverse planes.</li> <li>• Molding (Figure 5) is diagnosed when the skull bones were seen overlapping in the sagittal or transverse planes.</li> </ul>                                                                                                                                                       |

1  
2  
3 Because of ethical issues, the design of the study states that the attending obstetrician should be informed in case  
4 of clinical and US discordance when instrumental or operative delivery is attempted. The digital evaluation is  
5 considered to be correct if the FHPo is within  $\pm 45^\circ$  of the US determination.  
6

7 Cervical dilation will be evaluated only clinically, as the evaluation of this parameter is best achieved with digital  
8 assessment<sup>31</sup>.  
9

10  
11 **Timing:** clinical and US scans are performed hourly until complete dilation (1st phase of active labor) and at every  
12 15 minutes after complete dilation (2nd phase). The purpose of the apparently high number of examinations was  
13 to obtain accurate information in each labor in terms of correlation of FHP, FHPo and cervical dilatation. In a  
14 previous study in our clinic this methodology proved acceptable for the parturients<sup>40</sup>. The frequent evaluations in  
15 the second stage are meant to offer a better analysis of this critical stage of labor. Notation of time delivery will be  
16 used to calculate the time interval from each scan to delivery.  
17

18  
19 Ultrasound images will be saved and stored on ultrasound hard disk during labor, then transferred by the  
20 sonographer to a designated PC storage unit after birth. The images will be reviewed during the following week,  
21 by the same sonographer, who will also and input the offline measurements results into the database.  
22

23 The sonographer and the clinician are blinded to each other's findings (except FHPo, during the circumstances  
24 mentioned above) as the specific measurements are performed afterwards, offline and labor management is  
25 conducted by the Labor and Delivery department personnel. During labor, the available sonographer cannot be  
26 completely blinded to clinical findings, as he/she will perform the scans at certain time intervals, depending on the  
27 labor stage, that is established by the clinician's cervical dilatation assessment. However, the sonographer will only  
28 record the images. The clinician will note the observations on a partogram-like sheet that is not available for the  
29 sonographer, who in turn, will perform the measurements offline, after birth.  
30

31  
32 Labor characteristics will be recorded by the clinician on the study datasheet: mode and time of delivery, neonatal  
33 Apgar score and birth weight, whether labor was spontaneous or induced, use of oxytocin or epidural anaesthesia,  
34 occipital position at delivery. Maternal characteristics will be retrieved from the hospital records (patient files) by  
35 the personnel involved in data centralization: age, height, weight, ethnicity, parity, gestational age.  
36  
37  
38

39 The US labor assessments should not be biased by confounders that influence the quality of the clinical evaluations  
40 in labor (obesity, anterior placenta, caput, moulding), because the visualization of the fetal skull and pubic  
41 symphysis is easily achievable even in such conditions. To ensure protocol fidelity, all sonographers will have  
42 completed a one-day workshop and will participate in group supervision sessions programmed weekly in the first  
43 month of the study. This approach proved to be successful during the previous pilot study conducted in our center.  
44 The information provided to the clinician regarding the US determination of the FHPo in case of clinical –  
45 sonographic discordance before instrumental or operative delivery, could represent a theoretically bias of the study.  
46 However, many tertiary centres already use the US determination of the FHPo in such situations, and this aspect  
47 does not interfere with the objectives of our study.  
48  
49  
50

## 51 Outcome measures

### 52 *Primary outcome*

53  
54 The primary objective of this study is the elaboration of nomograms for the longitudinal US assessment of labor in  
55 unselected nulliparous and multiparous with fetal cephalic presentation. The nomograms represent the evolution  
56 of the progression markers (PA, DA, PD, HPD) in relation with time and cervical dilatation.  
57  
58  
59  
60

### Secondary outcomes

- to compare the US pattern of labor evolution in nulliparous and multiparous women.
- to study the influence of occiput position, body mass index, parturient age on the mechanism of delivery evaluated by US.
- to compare the labor clinical trend from our study data with the Friedman studies<sup>35,36</sup> and other recent research on the partogram<sup>39</sup>.
- to compare and correlate the US findings (sonopartogram data) with the classical clinical partogram parameters:
  - correlation of the FHPo determined by US with FHPo clinically estimated (by digital vaginal evaluation);
  - correlations between the US FHPo parameters and between US and clinical (head station) FHPo parameters;
  - the concordance between the fetal head station evaluations derived from US measurements and clinical digital estimations.
- to investigate the correlations between the data of the participating centres.
- to analyse the evolution of the sonographic measurements in spontaneous vaginal delivery versus obstructed labor cases, in primiparae versus multiparae, and in occiput anterior deliveries versus those with persistent occiput posterior.
- to evaluate the capability of the US technique to predict the labor outcome (vaginal or Cesarean birth) in both nulliparous and multiparous

### Data collection and management, Quality control

To ensure protocol fidelity, the sonographers will have completed a one-day workshop and will participate in group supervision sessions, programmed weekly in the first month of the study. This approach proved to be successful during the previous pilot study conducted in our center. The following procedures are to be followed:

- At the initial workshop will be established the standardised procedures regarding data collection, encoding of the clinical and ultrasound data and electronic storage;
- The principal investigators will organize training sessions to provide instructions on the protocol and study procedures for the sonographers at the beginning of the study;
- Periodic meetings will take place with study site personnel to discuss issues related to the conduct of the study;
- The principal investigators in the three centres will be available for consultation by telephone at request;
- Interim analyses monthly - the data manager will evaluate the data with the statistics personnel and will conduct a quality review of the database. The results of the interim analyses will be discussed between the principal investigators, who decide whether to continue, stop, or modify the trial.
- All the collected data will be anonymized. The data will be collected by the research team, processed and stored in the [www.zenodo.org](http://www.zenodo.org) research depository.

### Statistical methods

#### *Sample size estimation*

Although several studies have investigated the clinical course of labor, until present we do not have data regarding the nomograms for US evolution of labor. The number of patients enrolled in the clinical partogram studies varies

1  
2  
3 widely. However, the Friedman's study that still serves as the basis of how most physicians define normal labor,  
4 enrolled 500 primiparous at term<sup>37,38</sup>. On the other hand, we have a recent large, but retrospective study that  
5 analyzed the clinical labor records of more than 62,000 women from 19 hospitals across the U.S. and concluded  
6 that these criteria created 50 years ago may no longer be applicable to contemporary obstetric populations and for  
7 current obstetric management<sup>39</sup>.

8  
9 Regarding imaging studies, the prospective research on the trend of the labor progress using intrapartum  
10 transperineal US, gathered less than 100 cases each<sup>34,36,44</sup>.

11 The primary outcome of our study will be centile charts for each US progression marker in relation to time.

12 An important challenge of our study is to achieve a sufficient number of OP cases in both nulliparous and  
13 multiparous women. According to the Central Limit Theorem and the Large Enough Sample Condition, a sample  
14 size of at least 30 items is sufficient for describing a 'normal' behaviour of the sample, even if it is not governed by  
15 the Gaussian distribution. By looking at the *t*-table we can see that when using around 30 degrees of freedom, the  
16 value of *t* become approximately equal to the value of the *z* statistics<sup>45</sup>. Taking into account previously published  
17 studies, the overall rate of occiput posterior deliveries in nulliparous is around 7.2%, whereas for the multiparous  
18 deliveries is around 4%. Only in 65% of these cases, the outcome is vaginal birth. This implies that the  
19 corresponding sample size is 642 primiparous women, and 1154 multiparous women with both OP and AP who  
20 give their consent to participate in the study. Using this sample size, we achieve a suitable statistical power two-  
21 type of null hypothesis with default statistical power goals  $P \geq 95\%$  and type I error  $\alpha = 0.05$  level of significance.

22 In our pilot study, a cervical dilatation of more than 4 cm was noted in 16.34% of the primiparous and 37.5% of the  
23 multiparous that were admitted in the hospital with labor criteria. In such cases, data from the beginning of labor  
24 will not be available for calculation. In order to achieve the sample mentioned above with patients registered from  
25 the beginning of labor, we adjusted the study size to include 767 primiparous women and 1846 multiparous women.

### 26 *Statistical analysis*

27 The statistical analyses will be performed by IBM SPSS Statistics for Windows, Version 22.0. (Armonk, NY: IBM  
28 Corp.).

29 Descriptive statistics will be produced for all study variables (mother's age, height, weight, parity, gestational age,  
30 mode and time of delivery, whether labor was spontaneous or induced, use of oxytocin or epidural anaesthesia,  
31 occiput position, progression angle, progression distance, head direction angle, head to perineum distance).  
32 Continuous variables will be presented as the mean and standard deviation (SD) or median, if appropriate.  
33 Categorical data will be presented as frequency and percentage.

34 Data will be first tested for normality and equal variance.

35 Clinical obtained data from our study will be compared with similar data from other partograms. The results between  
36 groups (maternal, labor and neonatal characteristics of women assessed by classical clinical partograms or a more  
37 recent partogram and our sonopartogram) will be compared using Chi-square test or Fisher exact test (for  
38 categorical variables), and Student *t*-test or Mann Whitney test where applicable (for continuous variables) with a  
39 statistical significance level set at  $p < 0.05$ .

40 We will analyze the agreement between sonopartogram and clinical partogram in estimating fetal head position and  
41 fetal head station. For the fetal head position, we will assess the level of agreement between US and digital VE  
42 using Cohen's kappa statistics. Correlation coefficient (Pearson's correlation or the Spearman rank correlation or  
43 Kendall's rank correlation if appropriate) and linear regression will be employed for analyzing the strength of  
44 association between the fetal head station estimated by digital vaginal examination and the ultrasound parameters  
45 (HPD, PA, PD and HDA).



Pearson's correlation and regressions will be used for the evaluation of correlation between ultrasound parameters (PA, PD, HAD and HPD) and between US and time to delivery and digital vaginal examination (head station) for various clinical situations (nulliparous and multiparous, fetuses with OA and those with persistent OP position).

Reference ranges (90% range between 5th and 95th centiles) and the 95% confidence interval will be constructed for each ultrasound parameter and evolution in time will be display in graphic form separately for nulliparous and for multiparous. Predictive ability of each ultrasound parameters for vaginal delivery will be assessed by calculating sensitivity, specificity, positive predictive value, negative predictive value and likelihood ratio and by plotting receiver-operating characteristics (ROC) curve.

In order to identify factors that predict vaginal birth, for each subgroup population (nulliparous and multiparous) all analyses will use appropriate (that is, logistic or linear) regression models, with results presented as point estimates (odds ratios or difference in means), 95% confidence intervals and p values. Further secondary analyses will involve planned subgroup analyses and will use multivariable regression models. In all models, predictors (like maternal age, gestational age, clinically assessed cervical dilatation, maternal BMI) will be selected for inclusion in regression. We plan to include in our model covariates such as HPD, PA, PD, HDA and OP position. Based on the probabilities predicted by the logistic models, receiver operating characteristic (ROC) curves will be constructed and we will calculate and report the area under the curve, sensitivity and specificity rates with 95% confidence interval in predicting vaginal mode of delivery.

The time from the ultrasound examination at the beginning of active phase of labor to vaginal delivery will be evaluated with Kaplan–Meier and Cox regression analysis. Data for women with Cesarean section will be censored. In the Cox regression analyses, fetal head position and fetal head station parameters will be tested as possible predictive factors. In additional analyses, we will adjust for maternal age, BMI, gestational age and parity as possible confounders.

## Reporting of adverse events

Prenatal ultrasonography appears to be a safe investigation method, as until today there has been no study reported suggesting otherwise (Statement approved by the International Society of Ultrasound in Obstetrics and Gynecology (ISUOG) Board in September 2011 and by the World Federation of Ultrasound in Medicine and Biology (WFUMB) Council in August 2011)<sup>46</sup>. US is routinely used in everyday clinical practice for assessment of neonates, including cranial and cerebral examination. However, US involves energy exposure and that requires further investigation.

Regarding the perception of laboring women about US, there have been no reports in the literature of US causing discomfort.

All adverse events reported spontaneously by patients or observed by the obstetricians will be recorded. When an adverse event occurs, the treating physician will take all necessary and appropriate measures to ensure the safety of the patient.

## Ethical considerations and dissemination

Ethics approval of the study protocol was obtained from the Ethics Committees of the universities in the three centres. The trial is registered in the ClinicalTrials.gov Registry: NCT02326077, approved by the University of Medicine and Pharmacy Of Craiova Committee of Ethics and Academic and Scientific Deontology No: 18/26.02.2016.

### *Informed consent*

The US operator on duty will be responsible for explaining the procedure to the participants and for obtaining an informed written consent from all women accepting to take part in the study.

Regarding the unforeseen complications or health damage that may occur during or after labor, the management of labor and delivery is made exclusively based on the traditional clinical evaluation, by senior physicians. The US study protocol is only observational, without any obstruction for the clinical manoeuvres. On the other hand, it is made clear to all participants that US is considered safe in the third trimester and after birth, both for the mother and the baby.

### *Compensation and insurance for harmed patients*

There will be no special financial compensation; however, any negligence on the part of the physician may be covered by the doctors' liability insurance.

### *Declaration of interests*

The investigators do not have any financial and other competing interests nor any relationships with companies that may have a financial interest in the information obtained during the study. All investigators comply with the policy on conflicts of interest in research and relevant conflict of interest guidelines.

### *Dissemination*

The results of the study will be disseminated at national and international research conferences and as published articles in peer-reviewed journals. The study will be implemented and reported in line with the STROBE statement.

## Discussion

It has been widely shown before that despite the significant progress in the last decades in maternal-fetal medicine, labor management remained unchanged, based on traditional clinical "blind" evaluations (Leopold manoeuvres, digital clinical evaluation) which have been proved by many studies to be subjective and inexact. In our view, clinical skills should not be abandoned and ultrasonography should only complement clinical examination and not replace it. However, nowadays more than ever, an objective method of assessing labor is needed, given the rates of fetal and maternal trauma at birth and because of the increasing amount of medico-legal liability issues related to labor and delivery. The SonoLabor study aims to provide new objective evidence regarding the evaluation of the mechanism of labor with US.

The SonoLabor study differs from previous studies as it aims to assess all stages of labor, rather than just the second stage of labor to elaborate nomograms for the longitudinal US assessment of labor in unselected low-risk population, an important issue of the future sonopartograms. We identified only one pilot study in the literature that aimed to assess the application of sonopartogram<sup>34</sup>. A unique point of our protocol is the comparative evaluation of the US parameters for various clinical situations. This may facilitate the use of different nomograms in labor, adapted to the clinical characteristics of the laboring woman. Another strength of our study is the multicentre design that is useful to achieve a proper study size and an opportunity to compare the data recorded in different settings.

Although published six decades ago, Friedman's curve remains the only method for routine labor management today. Clinical studies showed that the pattern of labor progression and the present characteristics of the partogram differ significantly from the traditional Friedman curve<sup>39</sup>. Therefore, our study aims to develop curves for labor monitoring which will be not only objective, but also but also adapted to contemporary practice.

1  
2  
3 The challenge and limitation of this study is the achievement of a sufficient study size for the secondary objectives  
4 of the research. In order to produce specific sonopartograms regarding the maternal characteristics and occiput  
5 position, an important number of patients would be required, that may not be achievable during our present research.  
6 However, preliminary data will be published on this matter. We also hope that the dissemination of our study  
7 protocol will serve to future larger studies that will help to collect or complete the necessary data.  
8  
9

10 We are also aware that the participating sites in this study have certain experience in the intrapartum US  
11 assessment. Thus, the results might not be generalizable to other settings. Nevertheless, previous research  
12 demonstrated that intrapartum US is reproducible<sup>47</sup> and the learning curve is much easier for US than clinical  
13 examination, even for younger and less experienced colleagues<sup>48</sup>. The results of the current study will hopefully  
14 improve the evidence-based understanding of the mechanism of labor and establish an objective solution for the  
15 labor monitoring, complementary to the traditional clinical examination.  
16  
17  
18

### 19 **Ethics approval and consent to participate**

20  
21 Ethics approval of the study protocol was obtained from the Ethics institutional committees in the centres involved.  
22 The trial is registered in the ClinicalTrials.gov Registry: NCT02326077, with the approval from University of  
23 Medicine and Pharmacy Of Craiova Committee of Ethics and Academic and Scientific Deontology No:  
24 18/26.02.2016.  
25  
26

#### 27 *Informed consent*

28  
29 The US operator on duty is responsible for explaining the procedure to the participants and for obtaining an  
30 informed written consent from all women accepting to take part in the study.  
31  
32

33 Regarding the unforeseen complications or health damage that may occur during or after labor, the management  
34 of labor and delivery is made exclusively based on the traditional clinical evaluation, by senior physicians. The US  
35 study protocol is only observational, without any obstruction for the clinical manoeuvres. The only potential  
36 sonographic intervention in the clinical assessment of labor is due to the ethical issues regarding the neonatal  
37 outcome when instrumental delivery is attempted. Thus, the attending obstetrician will be informed in case of clinical  
38 and US discordance.  
39  
40

41 On the other hand, it is made clear to all participants that US is considered safe in the third trimester and after birth,  
42 both for the mother and the baby.  
43  
44

### 45 **Availability of data and material (Dissemination)**

46 The results of the study will be disseminated at national and international research conferences and as published  
47 articles in peer-reviewed journals. The study will be implemented and reported in line with the STROBE statement.  
48  
49

### 50 **Competing interests**

51 The authors and their relations have no financial connections with companies that may have an interest in the  
52 submitted work, and no non-financial interests that may be relevant to the article.  
53  
54

### 55 **Funding**

56 The potential funding sources will play no role in data collection, analysis and interpretation, in the writing of the  
57 reports, or the decision to submit the paper for publication. A funded PhD project provided the resources for a  
58  
59  
60

1  
2  
3 previous pilot study. Currently, the study has no outside funding. The project will take place as part of PhD and  
4 postdoctoral studies, and we will use the opportunities to apply for future research funding.  
5

### 6 **Authors' contributions**

7  
8 IDG AP and TS conceived and designed the study and will supervise the study implementation. IDG drafted the  
9 protocol of the study. DL, DG, CML DR, PC, ZL, NM and TD revised and refined the study protocol for an optimal  
10 implementation and provided final approval of the version to be published. CML, BS and SR provided  
11 methodological and statistical expertise and will conduct the statistical analysis. IDG and DR drafted a PhD salary  
12 grant proposal for a previous approved pilot study. DG, DR, PC, ZL, NR, RD and FM will be responsible for study  
13 management, staff training and supervision and data centralization. IDG, AP and TD are the directors of the sites  
14 and they will provide clinical expertise and on-site management of the study. All authors critically reviewed and  
15 approved the final version of the manuscript.  
16  
17  
18

### 19 **Acknowledgements**

20 The authors would like to thank to our study sites for their support.  
21  
22

### 23 **Current study status**

24 The SonoLabor study recruited patients during January - December 2016 for a pilot study of 168 deliveries. Data  
25 analysis was completed in January 2017 and the results were communicated at the 27th World Congress on  
26 Ultrasound in Obstetrics and Gynecology<sup>33</sup>. Then the project was discontinued, due to the lack of resources.  
27 Given the birth flow in the centres involved, the sample size required, the acceptability previously recorded and the  
28 disponible sonographers for intrapartum US evaluations, we should expect that the study should be completed  
29 during a two-years period of time.  
30  
31  
32

### 33 **Competing interests**

34 The authors and their relations have no financial connections with companies that may have an interest in the  
35 submitted work, and no non-financial interests that may be relevant to the article.  
36  
37  
38

### 39 **Details of ethics approval**

40 Ethics Research Committees of University of Medicine and Pharmacy and University of Athens approved the  
41 study protocol. Women will provide written consent.  
42  
43  
44

## 45 **References**

- 46 1. Sherer DM, Miodovnik M, Bradley KS, Langer O. Intrapartum fetal head position I: comparison between  
47 transvaginal digital examination and transabdominal ultrasound assessment during the active stage of  
48 labor. *Ultrasound Obstet Gynecol.* 2002;19(3):258-63.
- 49 2. Kreiser D, Schiff E, Lipitz S, Kayam Z, Avraham A, Achiron R. Determination of fetal occiput position by  
50 ultrasound during the second stage of labor. *J Matern Fetal Med.* 2001;10(4):283-6.
- 51 3. Sherer DM, Miodovnik M, Bradley KS, Langer O. Intrapartum fetal head position II: comparison between  
52 transvaginal digital examination and transabdominal ultrasound assessment during the second stage of  
53 labor. *Ultrasound Obstet Gynecol.* 2002;19(3):264-8.
- 54 4. Akmal S, Tsoi E, Kametas N, Howard R, Nicolaides KH. Intrapartum sonography to determine fetal head  
55 position. *J Matern Fetal Neonatal Med.* 2002;12(3):172-7.  
56  
57  
58  
59  
60

- 1
  - 2
  - 3
  - 4
  - 5
  - 6
  - 7
  - 8
  - 9
  - 10
  - 11
  - 12
  - 13
  - 14
  - 15
  - 16
  - 17
  - 18
  - 19
  - 20
  - 21
  - 22
  - 23
  - 24
  - 25
  - 26
  - 27
  - 28
  - 29
  - 30
  - 31
  - 32
  - 33
  - 34
  - 35
  - 36
  - 37
  - 38
  - 39
  - 40
  - 41
  - 42
  - 43
  - 44
  - 45
  - 46
  - 47
  - 48
  - 49
  - 50
  - 51
  - 52
  - 53
  - 54
  - 55
  - 56
  - 57
  - 58
  - 59
  - 60
5. Chou MR, Kreiser D, Taslimi MM, Druzin ML, El-Sayed YY. Vaginal versus ultrasound examination of fetal occiput position during the second stage of labor. *Am J Obstet Gynecol.* 2004;191(2):521-4.
  6. Dupuis O, Ruimark S, Corinne D, Simone T, André D, René-Charles R. Fetal head position during the second stage of labor: comparison of digital vaginal examination and transabdominal ultrasonographic examination. *Eur J Obstet Gynecol Reprod Biol.* 2005, 1;123(2):193-7.
  7. Oláh KS. Reversal of the decision for caesarean section in the second stage of labor on the basis of consultant vaginal assessment. *J Obstet Gynaecol.* 2005;25(2):115-6.
  8. Akmal S, Tsoi E, Nicolaides KH. Intrapartum sonography to determine fetal occipital position: interobserver agreement. *Ultrasound Obstet Gynecol.* 2004;24(4):421-4.
  9. Buchmann E, Libhaber E. Interobserver agreement in intrapartum estimation of fetal head station. *Int J Gynaecol Obstet.* 2008;101(3):285-9.
  10. Dupuis O, Silveira R, Zentner A, Dittmar A, Gaucherand P, Cucherat M, Redarce T, Rudigoz RC. Birth simulator: reliability of transvaginal assessment of fetal head station as defined by the American College of Obstetricians and Gynecologists classification. *Am J Obstet Gynecol.* 2005;192(3):868-74.
  11. Nizard J, Haberman S, Paltieli Y, Gonen R, Ohel G, Le Bourthe Y, Ville Y. Determination of fetal head station and position during labor: a new technique that combines ultrasound and a position-tracking system. *Am J Obstet Gynecol.* 2009;200(4):404.e1-5.
  12. Molina FS, Terra R, Carrillo MP, Puertas A, Nicolaides KH. What is the most reliable ultrasound parameter for assessment of fetal head descent? *Ultrasound Obstet Gynecol.* 2010;36(4):493-9.
  13. Tutschek B, Torkildsen EA, Eggebø TM. Comparison between ultrasound parameters and clinical examination to assess fetal head station in labor. *Ultrasound Obstet Gynecol.* 2013;41(4):425-9.
  14. Rayburn WF, Siemers KH, Legino LJ, Nability MR, Anderson JC, Patil KD. Dystocia in late labor: determining fetal position by clinical and ultrasonic techniques. *Am J Perinatol.* 1989;6(3):316-9.
  15. Souka AP, Haritos T, Basayiannis K, Noikokyri N, Antsaklis A. Intrapartum ultrasound for the examination of the fetal head position in normal and obstructed labor. *J Matern Fetal Neonatal Med.* 2003;13(1):59-63.
  16. Sherer DM, Abulafia O. Intrapartum assessment of fetal head engagement: comparison between transvaginal digital and transabdominal ultrasound determinations. *Ultrasound Obstet Gynecol.* 2003;21(5):430-6.
  17. Akmal S, Kametas N, Tsoi E, Hargreaves C, Nicolaides KH. Comparison of transvaginal digital examination with intrapartum sonography to determine fetal head position before instrumental delivery. *Ultrasound Obstet Gynecol.* 2003;21(5):437-40.
  18. Wong GY, Mok YM, Wong SF. Transabdominal ultrasound assessment of the fetal head and the accuracy of vacuum cup application. *Int J Gynaecol Obstet.* 2007;98(2):120-3.
  19. Barbera AF, Imani F, Becker T, Lezotte DC, Hobbins JC. Anatomic relationship between the pubic symphysis and ischial spines and its clinical significance in the assessment of fetal head engagement and station during labor. *Ultrasound Obstet Gynecol.* 2009;33(3):320-5.
  20. Ramphul M, Ooi PV, Burke G, Kennelly MM, Said SA, Montgomery AA, Murphy DJ. Instrumental delivery and ultrasound: a multicentre randomised controlled trial of ultrasound assessment of the fetal head position versus standard care as an approach to prevent morbidity at instrumental delivery. *BJOG.* 2014 Jul;121(8):1029-38.
  21. Ramphul M, Kennelly M, Murphy DJ. Establishing the accuracy and acceptability of abdominal ultrasound to define the foetal head position in the second stage of labour: a validation study. *Eur J Obstet Gynecol Reprod Biol.* 2012 Sep;164(1):35-9.

22. Dietz HP, Lanzarone V. Measuring engagement of the fetal head: validity and reproducibility of a new ultrasound technique. *Ultrasound Obstet Gynecol.* 2005;25(2):165-8.
23. Henrich W, Dudenhausen J, Fuchs I, Kämena A, Tutschek B. Intrapartum translabial ultrasound (ITU): sonographic landmarks and correlation with successful vacuum extraction. *Ultrasound Obstet Gynecol.* 2006;28(6):753-60.
24. Iliescu DG, Adam G, Tudorache S, Antsaklis P, Cernea N. Quantification of fetal head direction using transperineal ultrasound: an easier approach. *Ultrasound Obstet Gynecol.* 2012 Nov;40(5):607-8.
25. Ghi T, Farina A, Pedrazzi A, Rizzo N, Pelusi G, Pilu G. Diagnosis of station and rotation of the fetal head in the second stage of labor with intrapartum translabial ultrasound. *Ultrasound Obstet Gynecol.* 2009;33(3):331-6.
26. Barbera AF, Pombar X, Perugino G, Lezotte DC, Hobbins JC. A new method to assess fetal head descent in labor with transperineal ultrasound. *Ultrasound Obstet Gynecol.* 2009;33(3):313-9.
27. Kalache KD, Dückelmann AM, Michaelis SA, Lange J, Cichon G, Dudenhausen JW. Transperineal ultrasound imaging in prolonged second stage of labor with occipitoanterior presenting fetuses: how well does the 'angle of progression' predict the mode of delivery? *Ultrasound Obstet Gynecol.* 2009;33(3):326-30.
28. Youssef A, Maroni E, Ragusa A, De Musso F, Salsi G, Iammarino MT, Paccapelo A, Rizzo N, Pilu G, Ghi T. Fetal head-symphysis distance: a simple and reliable ultrasound index of fetal head station in labor. *Ultrasound Obstet Gynecol.* 2013;41(4):419-24.
29. Torkildsen EA, Salvesen KÅ, Eggebø TM. Prediction of delivery mode with transperineal ultrasound in women with prolonged first stage of labor. *Ultrasound Obstet Gynecol.* 2011;37(6):702-8.
30. Eggebø TM, Hassan WA, Salvesen KÅ, Lindtjørn E, Lees CC. Sonographic prediction of vaginal delivery in prolonged labor: a two-center study. *Ultrasound Obstet Gynecol.* 2014;43(2):195-201.
31. Eggebø TM, Økland I, Heien C, Gjessing LK, Romundstad P, Salvesen KA. Can ultrasound measurements replace digitally assessed elements of the Bishop score? *Acta Obstet Gynecol Scand.* 2009;88(3):325-31.
32. Iliescu D, Antsaklis P, Paulescu D, Comanescu A, Tudorache S, Antsaklis A, Ceausu I, Novac L, Cernea N, Kurjak A. Applications of ultrasound in prelabor and labor. *Donald School J Obstet Gynecol.* 2012, 6(3): 257-269
33. Iliescu DG, Tudorache S, Cernea N, Florea M, Capitanescu R, Novac M, Stoean R, Stoean C, Antsaklis P, Carbanaru O, Dragusin R. P13.03: Correlations of the sonopartogram with classic clinical partogram and key points from a pilot study, *Ultrasound in Obstetrics & Gynecology* 2017; 50 (Suppl. 1):194-195
34. Hassan WA, Eggebø T, Ferguson M, Gillett A, Studd J, Pasupathy D, Lees CC. The sonopartogram: a novel method for recording progress of labor by ultrasound. *Ultrasound Obstet Gynecol.* 2014;43(2):189-94.
35. Eggebø TM. Ultrasound is the future diagnostic tool in active labor. *Ultrasound Obstet Gynecol.* 2013;41(4):361-3.
36. Ghi T, Maroni E, Youssef A, Morselli-Labate AM, Paccapelo A, Montaguti E, Rizzo N, Pilu G. Sonographic pattern of fetal head descent: relationship with duration of active second stage of labor and occiput position at delivery. *Ultrasound Obstet Gynecol.* 2014 Jul;44(1):82-9.
37. Friedman EA. Primigravid labor; a graphicostatistical analysis. *Obstet Gynecol.* 1955 Dec;6(6):567-89.
38. Friedman EA. The graphic analysis of labor. *Am J Obstet Gynecol.* 1954; 68:1568-75
39. Zhang J, Troendle JF, Yancey MK. Reassessing the Labor Curve in Nulliparous Women. *American Journal of Obstetrics and Gynecology.* 2002;187(4):824-828.

- 1  
2  
3 40. Acceptability of Intrapartum Ultrasound Monitoring- Experience from a Romanian Longitudinal Study. D.G. Iliescu, S Tudorache, M.L. Cara, R. Dragusin, O. Carbutaru, M. Florea, C. Patru, L. Zorila, N.A. Dragoescu, L. Novac, N. Cernea. *Current Health Sciences Journal*, Volume 41 Issue 4 2015, 355-360.
- 7  
8 41. National Institute for Health and Care Excellence. Intrapartum care for healthy women and babies. London (UK): NICE; Published December 2014, Last updated: February 2017. <https://www.nice.org.uk/guidance/cg190>
- 11  
12 42. Murphy DJ, Burke G, Montgomery AA, Ramphul M; IDUS Study Group. Study protocol. IDUS - Instrumental delivery & ultrasound. A multi-centre randomised controlled trial of ultrasound assessment of the fetal head position versus standard care as an approach to prevent morbidity at instrumental delivery. *BMC Pregnancy Childbirth*. 2012 Sep 13;12:95.
- 17  
18 43. Eggebø TM, Gjessing LK, Heien C, Smedvig E, Økland I, Romundstad P, Salvesen KA. Prediction of labor and delivery by transperineal ultrasound in pregnancies with prelabor rupture of membranes at term. *Ultrasound Obstet Gynecol*. 2006;27(4):387-91.
- 21  
22 44. Tutschek B, Braun T, Chantraine F, Henrich W. A study of progress of labor using intrapartum translabial ultrasound, assessing head station, direction, and angle of descent. *BJOG*. 2011 Jan;118(1):62-9.
- 23  
24 45. Altman, D.G., *Practical statistics for medical research*, Chapman and Hall, 1991.
- 25  
26 46. Bioeffects and Safety Committee, Salvesen K, Lees C, Abramowicz J, Brezinka C, Ter Haar G, Maršál K; Board of the International Society of Ultrasound in Obstetrics and Gynecology (ISUOG). ISUOG-WFUMB statement on the non-medical use of ultrasound, 2011. *Ultrasound Obstet Gynecol*. 2011 Nov;38(5):608.
- 29  
30 47. Molina FS, Terra R, Carrillo MP, Puertas A, Nicolaidis KH. What is the most reliable ultrasound parameter for assessment of fetal head descent? *Ultrasound Obstet Gynecol*. 2010 Oct;36(4):493-9.
- 32  
33 48. Rozenberg P, Porcher R, Salomon LJ, Boirot F, Morin C, Ville Y. Comparison of the learning curves of digital examination and transabdominal sonography for the determination of fetal head position during labor. *Ultrasound Obstet Gynecol*. 2008 Mar;31(3):332-7.
- 36  
37  
38  
39  
40  
41  
42  
43  
44  
45  
46  
47  
48  
49  
50  
51  
52  
53  
54  
55  
56  
57  
58  
59  
60

Figure 1. Implementation of the SONOLABOR study.

Figure 2. Ultrasound determination of the occiput position in the first stage of labor.

A: Example of the probe orientation in the transabdominal suprapubic transverse plane. B: FHPo determination in the plane described in image A, based on the identification of cranium or cerebral structures: occiput (Oc), thalamus (T), interhemispheric septum (S), orbits (O). OA, occiput anterior; OP, occiput posterior; LOT, left occiput transverse; ROT, right occiput transverse; LOA left occiput anterior; ROA right occiput anterior; LOP, left occiput posterior; ROP, right occiput posterior.

Figure 3. Ultrasound determination of the occiput position in the second stage of labor.

A: Example of the probe orientation in the transperineal infrapubic transverse plane. B: Schematization of the structures visualized and the measurement of the midline angle between the midline (falx cerebri) and the anteroposterior axis of the maternal pelvis. C-H: Presentation of an example with midline angle measurement and evolution during anterior rotation of a transverse occiput. Occiput position is identified based on the visualization of the cerebral midline (interhemispheric septum, S) and choroid plexus (Px) direction (divergent posteriorly), or thalami aspect (triangular, with the base anteriorly). Midline angle gradually decreases during the anterior occiput rotation from the transverse position (C,D), as it reaches right anterior (E,F) and anterior (infrapubic) (G,H) positions.

Figure 4. Ultrasound determination of the fetal head descent/progression (FHPr). Placement of the transducer in the infrapubic translabial sagittal plane (A) and infrapubic transverse plane (B). C: measurement of the progression angle between the long axis of the pubic symphysis and a line extending from its most inferior portion tangentially to the fetal skull. D: measurement of the direction angle as the angle between the major longitudinal axis of the fetal head (perpendicular to the biparietal diameter) and the infrapubic line. E: measurement of the progression distance as the minimal distance between the infrapubic line and the leading part of the fetal skull (star). F: measurement of the head to perineum distance as the shortest distance from the skin surface of the perineum to the outer bony limit of the fetal skull.

Figure 5. A,B: Presentation of caput (star) in transperineal transverse (A) and sagittal evaluation (B). C: Molding of the cranium bones indicated with the arrow.



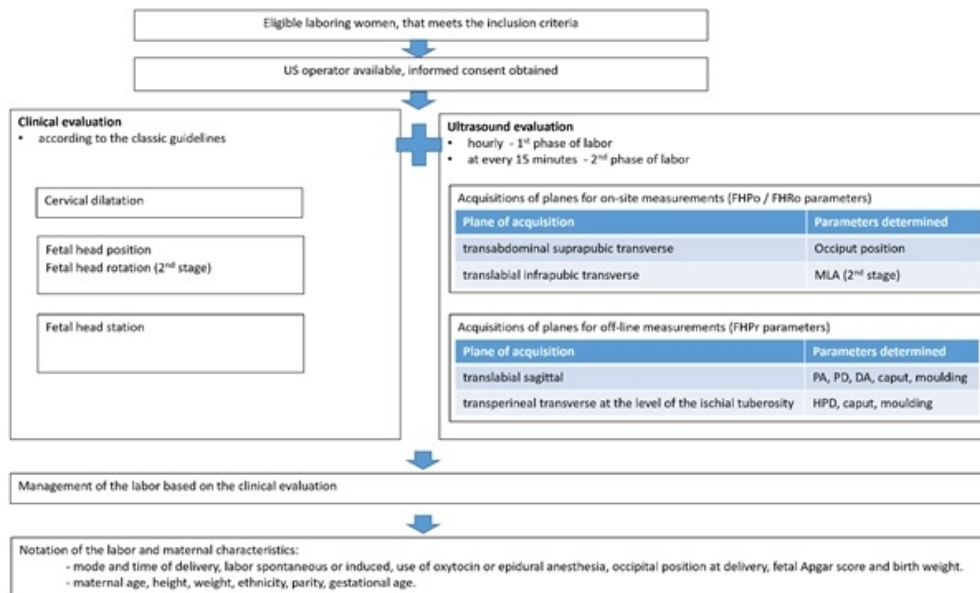

Implementation of the SONOLABOR study.

51x31mm (300 x 300 DPI)

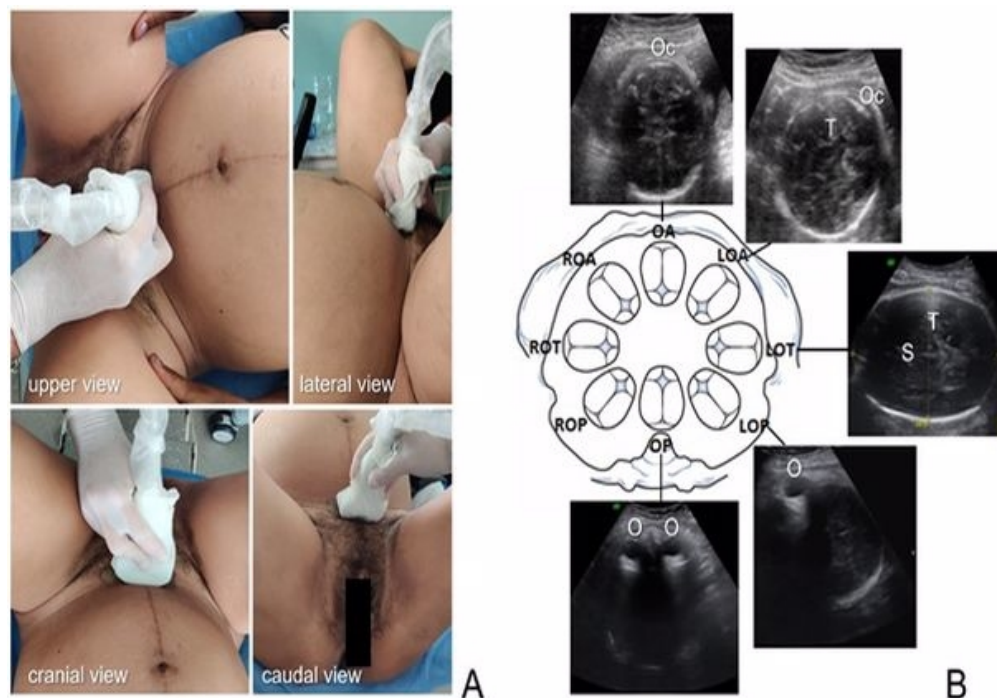

Figure 2. Ultrasound determination of the occiput position in the first stage of labor.  
 A: Example of the probe orientation in the transabdominal suprapubic transverse plane. B: FHPo determination in the plane described in image A, based on the identification of cranium or cerebral structures: occiput (Oc), thalamus (T), interhemispheric septum (S), orbits (O).  
 OA, occiput anterior; OP, occiput posterior, LOT, left occiput transverse; ROT, right occiput transverse; LOA left occiput anterior; ROA right occiput anterior; LOP, left occiput posterior; ROP, right occiput posterior.

51x43mm (300 x 300 DPI)

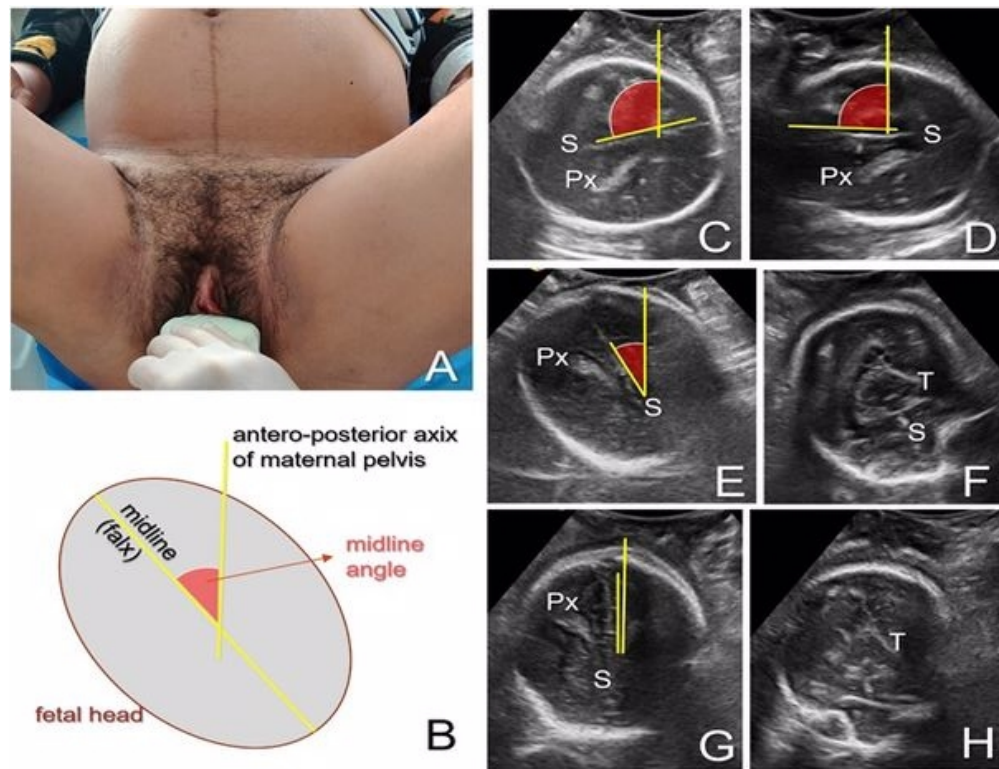

Figure 3. Ultrasound determination of the occiput position in the second stage of labor. A: Example of the probe orientation in the transperineal infrapubic transverse plane. B: Schematization of the structures visualized and the measurement of the midline angle between the midline (falx cerebri) and the anteroposterior axis of the maternal pelvis. C-H: Presentation of an example with midline angle measurement and evolution during anterior rotation of a transverse occiput. Occiput position is identified based on the visualization of the cerebral midline (interhemispheric septum, S) and choroid plexus (Px) direction (divergent posteriorly), or thalami aspect (triangular, with the base anteriorly). Midline angle gradually decreases during the anterior occiput rotation from the transverse position (C,D), as it reaches right anterior (E,F) and anterior (infrapubic) (G,H) positions.

51x39mm (300 x 300 DPI)

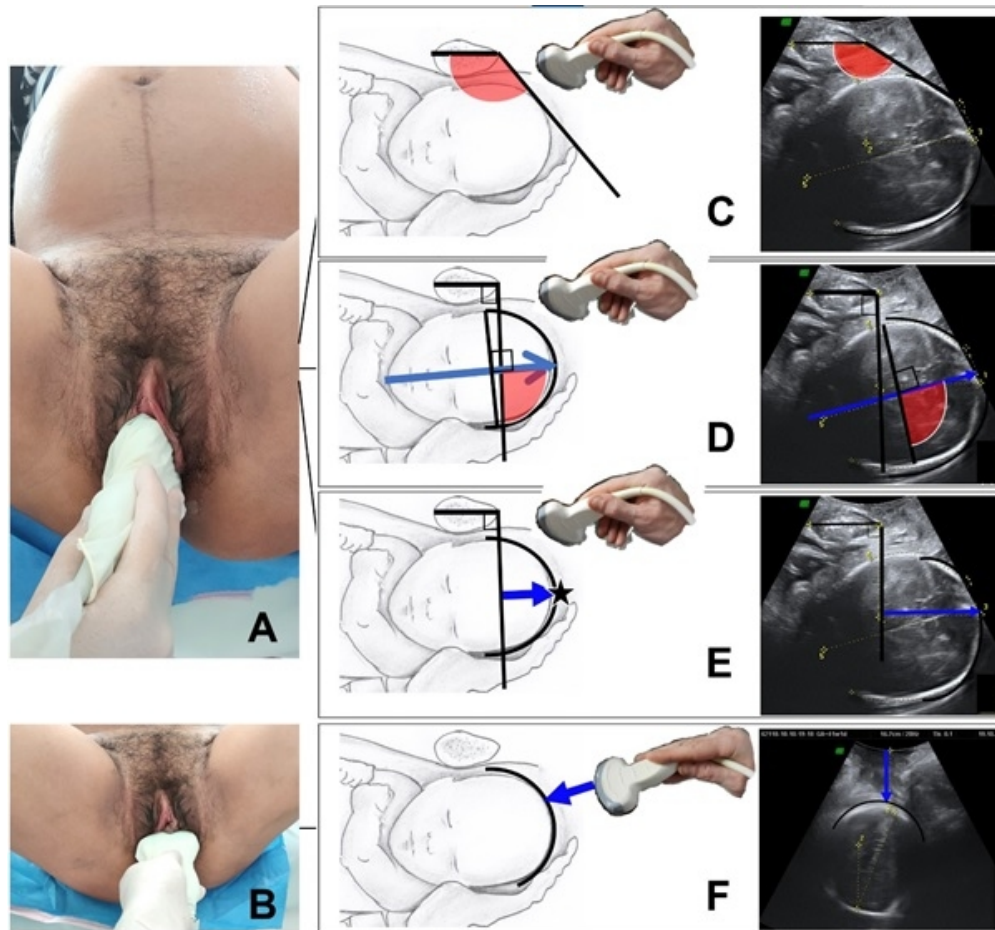

Figure 4. Ultrasound determination of the fetal head descent/progression (FHP). Placement of the transducer in the infrapubic translabial sagittal plane (A) and infrapubic transverse plane (B). C: measurement of the progression angle between the long axis of the pubic symphysis and a line extending from its most inferior portion tangentially to the fetal skull. D: measurement of the direction angle as the angle between the major longitudinal axis of the fetal head (perpendicular to the biparietal diameter) and the infrapubic line. E: measurement of the progression distance as the minimal distance between the infrapubic line and the leading part of the fetal skull (star). F: measurement of the head to perineum distance as the shortest distance from the skin surface of the perineum to the outer bony limit of the fetal skull.

50x47mm (300 x 300 DPI)

1  
2  
3  
4  
5  
6  
7  
8  
9  
10  
11  
12  
13  
14  
15  
16  
17  
18  
19  
20  
21  
22  
23  
24  
25  
26  
27  
28  
29  
30  
31  
32  
33  
34  
35  
36  
37  
38  
39  
40  
41  
42  
43  
44  
45  
46  
47  
48  
49  
50  
51  
52  
53  
54  
55  
56  
57  
58  
59  
60

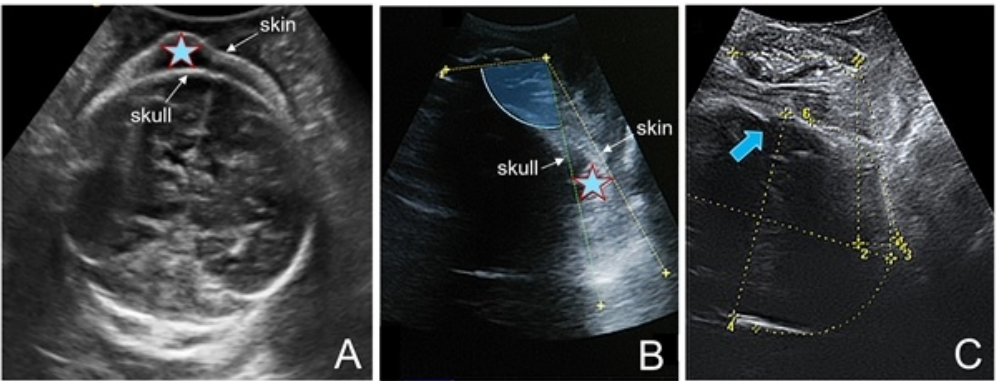

Figure 5. A,B: Presentation of caput (star) in transperineal transverse (A) and sagittal evaluation (B). C: Molding of the cranium bones indicated with the arrow.

50x19mm (300 x 300 DPI)

# BMJ Open

## Sonographic Evaluation of the Mechanism of Active Labor (SonoLabor study): observational study protocol regarding the implementation of the sonopartogram

|                                 |                                                                                                                                                                                                                                                                                                                                                                                                                                                                                                                                                                                                                                                                                                                                                                                                                                                                                                                                                                                                                                                                                                                                                                                                                                                                                                                              |
|---------------------------------|------------------------------------------------------------------------------------------------------------------------------------------------------------------------------------------------------------------------------------------------------------------------------------------------------------------------------------------------------------------------------------------------------------------------------------------------------------------------------------------------------------------------------------------------------------------------------------------------------------------------------------------------------------------------------------------------------------------------------------------------------------------------------------------------------------------------------------------------------------------------------------------------------------------------------------------------------------------------------------------------------------------------------------------------------------------------------------------------------------------------------------------------------------------------------------------------------------------------------------------------------------------------------------------------------------------------------|
| Journal:                        | <i>BMJ Open</i>                                                                                                                                                                                                                                                                                                                                                                                                                                                                                                                                                                                                                                                                                                                                                                                                                                                                                                                                                                                                                                                                                                                                                                                                                                                                                                              |
| Manuscript ID                   | bmjopen-2020-047188.R2                                                                                                                                                                                                                                                                                                                                                                                                                                                                                                                                                                                                                                                                                                                                                                                                                                                                                                                                                                                                                                                                                                                                                                                                                                                                                                       |
| Article Type:                   | Protocol                                                                                                                                                                                                                                                                                                                                                                                                                                                                                                                                                                                                                                                                                                                                                                                                                                                                                                                                                                                                                                                                                                                                                                                                                                                                                                                     |
| Date Submitted by the Author:   | 22-Jun-2021                                                                                                                                                                                                                                                                                                                                                                                                                                                                                                                                                                                                                                                                                                                                                                                                                                                                                                                                                                                                                                                                                                                                                                                                                                                                                                                  |
| Complete List of Authors:       | <p>Dira, Laurentiu Mihai; University of Medicine and Pharmacy of Craiova, Tudorache, Stefania; University of Medicine and Pharmacy of Craiova, Obstetrics and Gynecology</p> <p>Antsaklis, Panagiotis; University of Athens, Obstetrics and Gynecology</p> <p>Daskalakis, George; University of Athens, Obstetrics and Gynecology</p> <p>Themistoklis, Dagklis; Aristotle University of Thessaloniki</p> <p>Belciug, Smaranda; University of Craiova</p> <p>Stoean, Ruxandra; University of Craiova</p> <p>Novac, Marius; University of Medicine and Pharmacy of Craiova</p> <p>Cara, Monica Laura; University of Medicine and Pharmacy of Craiova</p> <p>Dragusin, Roxana; University of Medicine and Pharmacy of Craiova, Obstetrics and Gynecology</p> <p>Florea, Maria; University of Medicine and Pharmacy of Craiova, Obstetrics and Gynecology</p> <p>Patru, Ciprian; University of Medicine and Pharmacy of Craiova, Obstetrics and Gynecology</p> <p>Zorila, Lucian; University of Medicine and Pharmacy of Craiova, Obstetrics and Gynecology</p> <p>Nagy, Rodica; University of Medicine and Pharmacy of Craiova</p> <p>Ruican, Dan; University of Medicine and Pharmacy of Craiova</p> <p>Iliescu, Dominic Gabriel; University of Medicine and Pharmacy of Craiova, Departament of Obstetrics and Gynecology</p> |
| <b>Primary Subject Heading</b>: | Obstetrics and gynaecology                                                                                                                                                                                                                                                                                                                                                                                                                                                                                                                                                                                                                                                                                                                                                                                                                                                                                                                                                                                                                                                                                                                                                                                                                                                                                                   |
| Secondary Subject Heading:      | Diagnostics                                                                                                                                                                                                                                                                                                                                                                                                                                                                                                                                                                                                                                                                                                                                                                                                                                                                                                                                                                                                                                                                                                                                                                                                                                                                                                                  |
| Keywords:                       | Ultrasonography < OBSTETRICS, Fetal medicine < OBSTETRICS, Maternal medicine < OBSTETRICS                                                                                                                                                                                                                                                                                                                                                                                                                                                                                                                                                                                                                                                                                                                                                                                                                                                                                                                                                                                                                                                                                                                                                                                                                                    |
|                                 |                                                                                                                                                                                                                                                                                                                                                                                                                                                                                                                                                                                                                                                                                                                                                                                                                                                                                                                                                                                                                                                                                                                                                                                                                                                                                                                              |

SCHOLARONE™  
Manuscripts



I, the Submitting Author has the right to grant and does grant on behalf of all authors of the Work (as defined in the below author licence), an exclusive licence and/or a non-exclusive licence for contributions from authors who are: i) UK Crown employees; ii) where BMJ has agreed a CC-BY licence shall apply, and/or iii) in accordance with the terms applicable for US Federal Government officers or employees acting as part of their official duties; on a worldwide, perpetual, irrevocable, royalty-free basis to BMJ Publishing Group Ltd ("BMJ") its licensees and where the relevant Journal is co-owned by BMJ to the co-owners of the Journal, to publish the Work in this journal and any other BMJ products and to exploit all rights, as set out in our [licence](#).

The Submitting Author accepts and understands that any supply made under these terms is made by BMJ to the Submitting Author unless you are acting as an employee on behalf of your employer or a postgraduate student of an affiliated institution which is paying any applicable article publishing charge ("APC") for Open Access articles. Where the Submitting Author wishes to make the Work available on an Open Access basis (and intends to pay the relevant APC), the terms of reuse of such Open Access shall be governed by a Creative Commons licence – details of these licences and which [Creative Commons](#) licence will apply to this Work are set out in our licence referred to above.

Other than as permitted in any relevant BMJ Author's Self Archiving Policies, I confirm this Work has not been accepted for publication elsewhere, is not being considered for publication elsewhere and does not duplicate material already published. I confirm all authors consent to publication of this Work and authorise the granting of this licence.

# Sonographic Evaluation of the Mechanism of Active Labor (SonoLabor study): observational study protocol regarding the implementation of the sonopartogram

## Authors, institutions :

Dira Laurentiu<sup>1</sup>, MD, PhD candidate  
Tudorache Stefania<sup>1</sup>, MD, PhD, Associate Professor  
Antsaklis Panagiotis<sup>2</sup>, MD, PhD, Associate Professor  
Daskalakis George<sup>2</sup>, MD, PhD, Associate Professor  
Themistoklis Dagklis<sup>3</sup>, MD, PhD  
Belciug Smaranda<sup>4</sup>, PhD, Associate Professor  
Stoian Ruxandra<sup>4</sup>, PhD, Associate Professor  
Novac Marius<sup>5</sup>, MD, PhD, Lecturer  
Cara Monica – Laura<sup>6</sup>, MD, PhD, Assistant lecturer  
Dragusin Roxana<sup>1</sup>, MD, PhD, Assistant lecturer  
Florea Maria<sup>1</sup>, MD, PhD, Assistant lecturer  
Patru Ciprian<sup>1</sup>, MD, PhD, Lecturer  
Zorila Lucian<sup>1</sup>, MD, PhD, Assistant lecturer  
Nagy Rodica<sup>1</sup>, MD, PhD candidate  
Ruican Dan<sup>1</sup>, MD, PhD candidate  
Iliescu Dominic - Gabriel<sup>1</sup>, MD, PhD, Associate Professor

<sup>1</sup> Department of Obstetrics and Gynecology, University of Medicine and Pharmacy Craiova, University Emergency County Hospital Craiova, Romania

<sup>2</sup> Department of Obstetrics and Gynecology, University of Athens, Alexandra University Hospital, Greece

<sup>3</sup> Department of Obstetrics and Gynecology, Aristotle University of Thessaloniki, Ippokrateion Hospital, Greece

<sup>4</sup> Computer Science Department, University of Craiova, Romania

<sup>5</sup> Department of Intensive care and Anesthesiology, University of Medicine and Pharmacy Craiova, University Emergency County Hospital Craiova, Romania

<sup>6</sup> Department of Public Health, University of Medicine and Pharmacy Craiova, University Emergency County Hospital Craiova, Romania

**Corresponding author:** Cara Monica,  
University of Medicine and Pharmacy Craiova,  
Address: Petru Rares nr.2, Craiova, Dolj, CP: 200349, Romania,  
e-mail: monica-laura.cara@outlook.com,  
tel: 0040723963925,  
fax: 0040251502179

Word count, excluding title page, abstract, references, figures and tables: 4586



# Abstract

## Introduction

Over the last decades, a large body of literature have shown that intrapartum clinical digital pelvic estimations of fetal head position, station and progression in the pelvic canal are less accurate, compared to US scan. Given the increasing evidence regarding the advantages of using ultrasound (US) to evaluate the mechanism of labor, our study protocol aims to develop sonopartograms for fetal cephalic presentations. They will allow for a more objective evaluation of labor progression than the traditional labor monitoring, which could enable more rapid decisions regarding the mode of delivery.

**Methods / Analysis:** This is a prospective observational study performed in three university hospitals, with an unselected population of women admitted in labor at term. Both clinical and US evaluations will be performed assessing fetal head position, descent and rotation. Specific US parameters regarding fetal head position, progression and rotation will be recorded to develop nomograms in a similar way that partograms were developed. The primary outcome is to develop nomograms for the longitudinal US assessment of labor in unselected nulliparous and multiparous women with fetal cephalic presentation. The secondary aims are to assess the sonopartogram differences in occiput anterior and posterior deliveries, to compare the labor trend from our research with the classic and other recent partogram models and to investigate the capability of the US labor monitoring to predict the outcome of spontaneous vaginal delivery.

**Ethics and dissemination:** All protocols and the informed consent form comply with the Ministry of Health and the professional society ethics guidelines. University Ethics Committee approved the study protocol. The trial results will be published in peer-reviewed journals and at the conferences presentations. The study will be implemented and reported in line with the STROBE statement.

**Trial registration number:** ClinicalTrials.gov Registry: NCT02326077.

**Keywords:** intrapartum ultrasound, labor monitoring, prenatal diagnosis, fetal medicine, maternal medicine, ultrasonography.

## Strengths and limitations of this study

### Strengths

- The multicentre design on representative population and the blinded clinical / ultrasound assessment aims to intercept the potential sources of bias.
- The SonoLabor study differs from previous studies as it aims to assess all stages of labor, rather than just the second stage of labor to elaborate nomograms for the longitudinal US assessment of labor in unselected low-risk population, an important issue of the future sonopartograms.
- Sonographic and clinical evaluation of the labor progression in any cephalic presentation (not only with occiput anterior position).
- Our study aims to develop curves for labor monitoring which will be not only objective, but also but also adapted to contemporary practice. Clinical studies showed that the pattern of labor progression and the present characteristics of the partogram differ significantly from the traditional Friedman curve

### Limitations

1  
2  
3 The high number of laboring women needed to investigate the characteristics of each clinical situation targeted in  
4 the study design. In order to produce specific sonopartograms regarding the maternal characteristics and occiput  
5 position, an important number of patients would be required, that may not be achievable during our present research.  
6 We hope that the publication of our study protocol, dissemination of the results and the storage of the anonymized  
7 collected data in a research depository will serve to future larger studies that will help to collect or complete the  
8 necessary data.  
9  
10

- 11 • The concept of normality is population-based and depends on various management attitudes (for example epidural  
12 analgesia, active management of labor), different characteristics of the partogram are observed that may affect  
13 generalizability.  
14  
15

## 16 Introduction

17  
18 Over the last decades, a large body of literature has shown that clinical digital pelvic estimations of fetal head  
19 position, station and progression in the pelvic canal are not accurate during the first<sup>1</sup> and second stage of labor<sup>1-6</sup>,  
20 poorly reproducible when compared to US<sup>7-9</sup>, poorly reliable<sup>10-12</sup>, experience-dependent<sup>1,4</sup> and often inexact in  
21 challenging labor circumstances, such as: prolonged first stage of labor<sup>13</sup>, cases with arrested cervical dilation<sup>14</sup>,  
22 obstructed labor<sup>15</sup>, fetal head engagement<sup>10,16</sup>, posterior and transverse occiput locations<sup>6,14</sup>, or caput 4. This may  
23 imply significant consequences on the decision of the appropriate delivery mode, because digital examination is  
24 less reliable especially when obstetrical interventions are more likely to be needed<sup>15,17-21</sup>. Intrapartum sonographic  
25 evaluation may not provide a solution for all these conditions mentioned above, but previous studies have  
26 demonstrated the potential to decrease the rate of late Cesarean extractions in prolonged labor cases, and the  
27 various approaches proposed in the literature were considered by our study design. Many studies provided  
28 sonographic data regarding the fetal head descent / progression (FHPr) in the second stage of labor and proposed  
29 several easily measurable and reliable parameters, capable to predict the vaginal or operative outcome of the  
30 delivery with occiput anterior positions<sup>22-28</sup>. The literature regarding US evaluation in the first stage of labor is  
31 lesser, but based on available data US evaluation appears to be useful for the prognosis of labor<sup>29,30,31</sup>.

32 Given the increasing evidence regarding the advantages offered by using US in labor, our group concluded that  
33 the development of a *sonopartogram*, as an adjuvant to or a replacement of traditional labor monitoring, provides  
34 the setting for a more objective evaluation of labor progression, which could enable more rapid decisions regarding  
35 the mode of delivery<sup>32,33</sup>. Intrapartum US evaluation is not meant to change the standard principles for labor  
36 mechanism evaluation, but to provide accurate evaluation of the main parameters involved: fetal head position and  
37 rotation, fetal head progression and engagement.  
38

39 The SonoLabor study aims to provide new objective evidence regarding the evaluation of the mechanism of labor  
40 with US. There is few information in the literature regarding the ultrasonographic monitoring of the entire active  
41 labor<sup>34-36</sup>. A recent proof-of-concept study showed that the sonopartogram is feasible in most cases<sup>34</sup>. However,  
42 a study of the paired clinical and sonographic assessments of labor in a large, unselected population has not yet  
43 been conducted. Furthermore, there are no nomograms for the ultrasound monitoring of labor. Nowadays, the use  
44 of ultrasound in labor is generally limited to research settings and a relatively small number of women has been  
45 studied. Therefore, efforts should be made to describe the value of an objective partogram in general practice.  
46

47 This study is designed to produce an original multicentre longitudinal assessment of the mechanism of active labor,  
48 including both stages, in a representative population, using concomitant blinded clinical and sonographic  
49 evaluations in unselected low-risk parturient women at term. A unique point of our protocol is the comparative  
50 evaluation of the US parameters for various clinical situations. This may facilitate the use of different nomograms  
51 in labor, adapted to the clinical characteristics of the laboring woman. Another strength of our study is the  
52  
53  
54  
55  
56  
57  
58  
59  
60

1  
2  
3 multicentre design that is useful to achieve a proper study size and an opportunity to compare the data recorded  
4 in different settings.

5 The aim of this paper is to describe the protocol of the study.  
6  
7  
8

## 9 Objectives

10  
11 The primary objective of this study is the development of nomograms for ultrasound measured variables during  
12 labor in unselected nulliparous and multiparous women at term with fetal cephalic presentation.

13 The secondary objectives of the study are:

- 14 • to compare the US pattern of labor evolution in nulliparous and multiparous women.
- 15 • to study the influence of occiput position, body mass index, parturient age on the labor progression  
16 evaluated by US.
- 17 • to correlate the labor trend from our study with the Friedman studies<sup>37,38</sup> and other recent research on the  
18 partogram<sup>39</sup> regarding the progression of labor by means of objective US evaluation.
- 19 • to correlate the US and standard clinical findings regarding the mechanism of labor, e.g., fetal occiput  
20 position and head descent during active labor.
- 21 • to investigate the correlations between the data of the participating centres.
- 22 • to analyse the temporal variation of the sonographic measurements in spontaneous vaginal delivery  
23 versus obstructed labor in nulliparae versus multiparae.
- 24 • to analyse the evolution of the sonographic measurements in spontaneous vaginal delivery versus  
25 obstructed labor in fetuses with occiput anterior versus those with persistent occiput posterior.
- 26 • to investigate the value of combined US measurements to predict the outcome of vaginal delivery.  
27  
28  
29  
30  
31  
32  
33

## 34 Methods and analysis

### 35 Study design and setting

36  
37 This is an observational cohort prospective study, which will take place in three tertiary maternity hospitals  
38 (University Emergency County Hospital Craiova, Alexandra University Hospital of Athens and Ippokrateion Hospital  
39 Thessaloniki), with more than 4000 deliveries per annum. The study aims to record simultaneously the labor  
40 progress by clinical and US evaluations in women in labor at term, with singleton cephalic presentation. We will  
41 include low-risk pregnancies, according the criteria defined in the Participants section.  
42  
43  
44  
45

### 46 Patient and Public Involvement

47  
48 We conducted a previous study<sup>40</sup> during the development of this research question, where we evaluated the  
49 acceptability of the method and found that the vast majority of laboring women (98%) agree with the supplementary  
50 US investigation protocol and the demographic characteristics did not influence the rate of acceptance. Most of the  
51 women (93% of accepters and 75% of decliners) had little difficulty deciding whether or not to have the scan  
52 protocol. All women who were scanned during labor found it an acceptable experience, and only 21% of women  
53 without epidural anesthesia rated the perceived difficulty as "mild" or "discomforting". Women rated having the  
54 intrapartum scan as being significantly less difficult than having a cervical smear, transvaginal scan or having a  
55 digital clinical evaluation. Two-thirds (67%) of the patients expressed increased confidence while being able to  
56 follow along the medical personnel the fetal head progression on the ultrasound screen. Almost all of the consenting  
57  
58  
59  
60

women (97%) who had the intrapartum US scans and all the 4 decliners said they would definitely or probably agree such ultrasound monitoring in a future labor, if this technique is proven useful for the labor outcome.

## Participants

All pregnant women admitted in active labor at term are considered eligible for the study. They will be consecutively included in the study, depending on the availability of the US operators involved in the study. We will try to attract a large team of collaborators, in order to investigate as many eligible cases as possible. Cases planned for elective caesarean section, or involving imminent intention to deliver, with non-cephalic presentation, intra-uterine death, multiple pregnancies or resulting neonates weighting less than 2500g or more than 4000g will be excluded from the study. Also, we will exclude women with previous cervical surgery (e.g. cone biopsy, cervical cerclage), those younger than 18 years, or those considered in the opinion of the researcher as having language or learning impairment.

Following the clinical evaluation, women will be admitted in the first stage of labor when there are regular painful contractions and there is a progressive cervical dilatation from 4 cm, and the second stage will be established based on the finding of full dilatation of the cervix<sup>41</sup> regardless of whether the parturients underwent artificial rupture of the membranes, Oxytocin augmentation or epidural anaesthesia.

Gestational age will be determined by the last menstrual period in women with regular menses, confirmed with US dating, preferably during the first trimester. If the first trimester biometry is not consistent with the menstrual dating by more than one week, gestational age will be established based only on the sonographic evaluation. In women with irregular menses, the gestational age will be determined solely based on the first fetal biometry evaluation in the first half of pregnancy.

## Procedures

### *Recruitment*

During their usual consultation in the labor ward, in an eligible case, the physician on duty provides brief information about the research and invites the patient to take part in the study. If the patient shows interest in the study and meets the inclusion criteria, a face-to-face appointment with the ultrasound operator is arranged. The details of the study and the potential benefits of the research will be thoroughly explained to the patient. The only direct benefit of the laboring women that participate in the study would be the communication between the obstetrician and sonographer regarding fetal head position when instrumental delivery is attempted, as presented in the Interventions section. If the patient agrees to participate in the study, written informed consent will be obtained.

### *Interventions*

All pregnant women that meet the inclusion criteria will be assessed clinically by the physician on duty. The managing clinician is a senior consultant not involved in the study.

**Clinical examinations** will take place in women in active labor just before the US assessments (Figure 1). The clinician will note the observations on a specially designed partogram-like sheet that will be used for women in labor who agree to participate in the study. The following labor parameters must be noted before US assessment:

- **cervical dilation** in centimetres,
- **fetal head position (FHPO)** – the evaluation of occiput position in both labor stages. Occiput position will be classified as occiput anterior (OA), occiput posterior (OP), left or right occiput transverse (LOT or ROT), left or right occiput anterior (LOA or ROA), or left or right occiput posterior (LOP or ROP)<sup>5,42</sup>,

- **fetal head progression (FHP<sub>r</sub>)** – determined by the evaluation of head station in relation to the ischial spines,
- Presence of **caput**, with the approximate diameter,
- Presence of **molding** and grading: closure of sutures with no overlap (grade 1), reducible bones overlap (grade 2) and irreducible overlap (grade 3).

Clinical examination will be followed by transabdominal and transperineal **ultrasound evaluations** conducted by obstetricians with appropriate training in US in labor, with minimum 1 year of experience in the field. Mobile and compact US machines will be used: Logic e (GE Healthcare, China), GE Voluson P6, Samsung R7, BenQ T3300 and ALOKA f31 equipped with 2–5 and 2-6 MHz 2D convex transducers.

The objectives of US evaluations are similar to those of standard clinical assessment. The purpose of US evaluations is to document the progression of labor using objective measurements for the main parameters involved in the mechanism of labor:

- **fetal head position (FHP<sub>o</sub>)**, by determining occiput position,
- **fetal head rotation** in the second stage of labor, by measuring the midline angle (MLA),
- **fetal head descent or progression (FHP<sub>r</sub>)**, by evaluating the relation between the fetal head and maternal landmarks, using specific measurements: progression angle (PA), progression distance (PD), head direction angle (HDA), head to perineum distance (HPD),
- **caput** measurement, if present,
- **molding** notation, if present.

In Table 1 we present the sonographic measurements, in relation to the acquisition planes and the features of labor mechanism that are involved. The images will be stored on the hard disk drive of the system for off-line analysis and the measurements will be performed by the sonographer who evaluated the case, according to the techniques described in the literature<sup>5,22-27,42,43</sup> (Table 1).

Table 1. Acquisition of US planes, and ultrasound measurements performed offline, according previous literature

| Labor mechanism feature                                                                           | Acquisition plane                                                                                | Ultrasound measurements                                                                                                                                                                                                                                                                                                                                                                                                                                                                                                                                                                                                                   |
|---------------------------------------------------------------------------------------------------|--------------------------------------------------------------------------------------------------|-------------------------------------------------------------------------------------------------------------------------------------------------------------------------------------------------------------------------------------------------------------------------------------------------------------------------------------------------------------------------------------------------------------------------------------------------------------------------------------------------------------------------------------------------------------------------------------------------------------------------------------------|
| Fetal head position (FHP <sub>o</sub> ) in the first stage of labor                               | Transabdominal suprapubic transverse plane                                                       | <ul style="list-style-type: none"> <li>• Occiput position (Figure 2)</li> </ul> <p>Both clinical and US findings of the FHP<sub>o</sub> are recorded on a data sheet depicting a circle, like a clock, divided into 24 sections, each of 15°, and the position of the occiput is assigned as anterior (OA), posterior (OP), left anterior (LOA), right anterior (ROA), left posterior (LOP), right posterior (ROP), right transverse (ROT), left transverse (LOT)<sup>5,42</sup></p> <p>The position of the occiput is determined based on the identification of the midline, thalami, choroid plexus, cerebellum, orbits or occiput.</p> |
| Fetal head position (FHP <sub>o</sub> ) in the second stage of labor, evaluation of head rotation | Transperineal infrapubic transverse plane (Figure 3), with visualization of the cerebral midline | <ul style="list-style-type: none"> <li>• Occiput position</li> <li>• Midline angle (MLA) (Figure 3)</li> </ul>                                                                                                                                                                                                                                                                                                                                                                                                                                                                                                                            |

|                                         |                                                                                                                                                                                                                                          |                                                                                                                                                                                                                                                                                                                                                                                                                                                                                                                                                                                                                                                                                                           |
|-----------------------------------------|------------------------------------------------------------------------------------------------------------------------------------------------------------------------------------------------------------------------------------------|-----------------------------------------------------------------------------------------------------------------------------------------------------------------------------------------------------------------------------------------------------------------------------------------------------------------------------------------------------------------------------------------------------------------------------------------------------------------------------------------------------------------------------------------------------------------------------------------------------------------------------------------------------------------------------------------------------------|
|                                         |                                                                                                                                                                                                                                          | <p>The position of the occiput (OA, OP, LOA, ROA, LOP, ROP) is determined in a similar fashion transperineally in the 2<sup>nd</sup> stage of labor.</p> <p>Midline angle (MLA) is calculated<sup>25</sup> based on the visualization of the cerebral midline in relation to the antero-posterior axis of the maternal pelvis - rotation angle or midline angle (MLA).</p>                                                                                                                                                                                                                                                                                                                                |
| Fetal head descent / progression (FHPr) | Transperineal translabial sagittal plane                                                                                                                                                                                                 | <ul style="list-style-type: none"> <li>• Progression angle (PA)<sup>26,27</sup> (Figure 4), as the angle between the longitudinal axis of the pubic symphysis and the line running from the anterior edge of the pubic symphysis tangentially to the leading edge of the fetal skull.</li> <li>• Progression distance (PD)<sup>22</sup> (Figure 4), as the minimal distance between a vertical line from inferior apex of the symphysis (infrapubic line) and the leading edge of the fetal skull.</li> <li>• Head direction angle (HDA)<sup>23,24</sup> (Figure 4), as the direction of the line perpendicular to the widest diameter of the fetal head, with respect to the infrapubic line.</li> </ul> |
|                                         | Transperineal translabial transverse plane, at the level of the ischial tuberosity, applying firm pressure without creating discomfort, and the transducer moved and angled until the shortest distance to the fetal skull is visualized | <ul style="list-style-type: none"> <li>• Head to perineum distance (HPD)<sup>43</sup>, as the shortest distance from the outer bony limit of the fetal skull to the skin surface of the perineum (Figure 4).</li> </ul>                                                                                                                                                                                                                                                                                                                                                                                                                                                                                   |
| Caput and molding                       | Transperineal sagittal and transverse plane                                                                                                                                                                                              | <ul style="list-style-type: none"> <li>• Caput (Figure 5) is measured as the maximum distance between the leading part of the skull and the fetal skin in the sagittal or transverse planes.</li> <li>• Molding (Figure 5) is diagnosed when the skull bones were seen overlapping in the sagittal or transverse planes.</li> </ul>                                                                                                                                                                                                                                                                                                                                                                       |

Because of ethical issues, the design of the study states that the attending obstetrician should be informed in case of clinical and US discordance when instrumental or operative delivery is attempted. The digital evaluation is considered to be correct if the FHPr is within  $\pm 45^\circ$  of the US determination.

Cervical dilation will be evaluated only clinically, as the evaluation of this parameter is best achieved with digital assessment<sup>31</sup>.

**Timing:** clinical and US scans are performed hourly until complete dilation (1st phase of active labor) and at every 15 minutes after complete dilation (2nd phase). The purpose of the apparently high number of examinations was

1  
2  
3 to obtain accurate information in each labor in terms of correlation of FHP<sub>r</sub>, FHP<sub>o</sub> and cervical dilatation. In a  
4 previous study in our clinic this methodology proved acceptable for the parturients<sup>40</sup>. The frequent evaluations in  
5 the second stage are meant to offer a better analysis of this critical stage of labor. Notation of time delivery will be  
6 used to calculate the time interval from each scan to delivery.  
7

8  
9  
10  
11  
12  
13  
14  
15  
16  
17  
18  
19  
20  
21  
22  
23  
24  
25  
26  
27  
28  
29  
30  
31  
32  
33  
34  
35  
36  
37  
38  
39  
40  
41  
42  
43  
44  
45  
46  
47  
48  
49  
50  
51  
52  
53  
54  
55  
56  
57  
58  
59  
60

Ultrasound images will be saved and stored on ultrasound hard disk during labor, then transferred by the sonographer to a designated PC storage unit after birth. The images will be reviewed during the following week, by the same sonographer, who will also and input the offline measurements results into the database.

The sonographer and the clinician are blinded to each other's findings (except FHP<sub>o</sub>, during the circumstances mentioned above) as the specific measurements are performed afterwards, offline and labor management is conducted by the Labor and Delivery department personnel. During labor, the available sonographer cannot be completely blinded to clinical findings, as he/she will perform the scans at certain time intervals, depending on the labor stage, that is established by the clinician's cervical dilatation assessment. However, the sonographer will only record the images. The clinician will note the observations on a partogram-like sheet that is not available for the sonographer, who in turn, will perform the measurements offline, after birth.

Labor characteristics will be recorded by the clinician on the study datasheet: mode and time of delivery, neonatal Apgar score and birth weight, whether labor was spontaneous or induced, use of oxytocin or epidural anaesthesia, occipital position at delivery. Maternal characteristics will be retrieved from the hospital records (patient files) by the personnel involved in data centralization: age, height, weight, ethnicity, parity, gestational age.

The US labor assessments should not be biased by confounders that influence the quality of the clinical evaluations in labor (obesity, anterior placenta, caput, moulding), because the visualization of the fetal skull and pubic symphysis is easily achievable even in such conditions. To ensure protocol fidelity, all sonographers will have completed a one-day workshop and will participate in group supervision sessions programmed weekly in the first month of the study. This approach proved to be successful during the previous pilot study conducted in our center. The information provided to the clinician regarding the US determination of the FHP<sub>o</sub> in case of clinical – sonographic discordance before instrumental or operative delivery, could represent a theoretical bias of the study. However, many tertiary centres already use the US determination of the FHP<sub>o</sub> in such situations, and this aspect does not interfere with the objectives of our study.

## Outcome measures

### *Primary outcome*

The primary objective of this study is the elaboration of nomograms for the longitudinal US assessment of labor in unselected nulliparous and multiparous with fetal cephalic presentation. The nomograms represent the evolution of the progression markers (PA, DA, PD, HPD) in relation with time and cervical dilatation.

### *Secondary outcomes*

- to compare the US pattern of labor evolution in nulliparous and multiparous women.
- to study the influence of occiput position, body mass index, parturient age on the mechanism of delivery evaluated by US.
- to compare the labor clinical trend from our study data with the Friedman studies<sup>35,36</sup> and other recent research on the partogram<sup>39</sup>.
- to correlate the US findings with classical clinical estimations:
  - correlation of the FHP<sub>o</sub> determined by US with FHP<sub>o</sub> clinically estimated (by digital vaginal evaluation);

- correlations between the US FHP parameters and between US and clinical (head station) FHP parameters;
- the concordance between the fetal head station evaluations derived from US measurements and clinical digital estimations.
- to investigate the correlations between the data of the participating centres.
- to analyse the evolution of the sonographic measurements in spontaneous vaginal delivery versus obstructed labor cases, in nulliparae versus multiparae, and in occiput anterior deliveries versus those with persistent occiput posterior.
- to evaluate the capability of the US technique to predict the labor outcome (vaginal or Cesarean birth) in both nulliparous and multiparous

## Data collection and management, Quality control

To ensure protocol fidelity, the sonographers will have completed a one-day workshop and will participate in group supervision sessions, programmed weekly in the first month of the study. This approach proved to be successful during the previous pilot study conducted in our center. The following procedures are to be followed:

- At the initial workshop will be established the standardised procedures regarding data collection, encoding of the clinical and ultrasound data and electronic storage;
- The principal investigators will organize training sessions to provide instructions on the protocol and study procedures for the sonographers at the beginning of the study;
- Monthly meetings will take place between study site personnel to discuss issues related to the conduct of the study and supplementary convocations will be announced whenever necessary;
- The principal investigators in the three centres will be available for consultation by telephone at request;
- Interim analyses monthly - the data manager will evaluate the data with the statistics personnel and will conduct a quality review of the database. The results of the interim analyses will be discussed between the principal investigators, who decide whether to continue, stop, or modify the trial.
- All the collected data will be anonymized. The data will be collected by the research team, processed and stored in the [www.zenodo.org](http://www.zenodo.org) research depository.

## Statistical methods

### *Sample size estimation*

Although several studies have investigated the clinical course of labor, until present we do not have data regarding the nomograms for US evolution of labor. The number of patients enrolled in the clinical partogram studies varies widely. However, the Friedman's study that still serves as the basis of how most physicians define normal labor, enrolled 500 nulliparous at term<sup>37,38</sup>. On the other hand, we have a recent large, but retrospective study that analyzed the clinical labor records of more than 62,000 women from 19 hospitals across the U.S. and concluded that these criteria created 50 years ago may no longer be applicable to contemporary obstetric populations and for current obstetric management<sup>39</sup>.

Regarding imaging studies, the prospective research on the trend of the labor progress using intrapartum transperineal US, gathered less than 100 cases each<sup>34,36,44</sup>.

The primary outcome of our study will be centile charts for each US progression marker in relation to time.

An important challenge of our study is to achieve a sufficient number of OP cases in both nulliparous and multiparous women. According to the Central Limit Theorem and the Large Enough Sample Condition, a sample size of at least 30 items is sufficient for describing a 'normal' behaviour of the sample, even if it is not governed by



1  
2  
3 the Gaussian distribution. By looking at the *t*-table we can see that when using around 30 degrees of freedom, the  
4 value of *t* become approximately equal to the value of the *z* statistics<sup>45</sup>. Taking into account previously published  
5 studies, the overall rate of occiput posterior deliveries in nulliparous is around 7.2%, whereas for the multiparous  
6 deliveries is around 4%. Only in 65% of these cases, the outcome is vaginal birth. This implies that the  
7 corresponding sample size is 642 nulliparous women, and 1154 multiparous women with both OP and OA who  
8 give their consent to participate in the study. Using this sample size, we achieve a suitable statistical power two-  
9 type of null hypothesis with default statistical power goals  $P \geq 95\%$  and type I error  $\alpha = 0.05$  level of significance.  
10 In our pilot study, a cervical dilatation of more than 4 cm was noted in 16.34% of the nulliparous and 37.5% of the  
11 multiparous that were admitted in the hospital with labor criteria. In such cases, data from the beginning of labor  
12 will not be available for calculation. In order to achieve the sample mentioned above with patients registered from  
13 the beginning of labor, we adjusted the study size to include 767 nulliparous women and 1846 multiparous women.  
14  
15  
16  
17

### 18 *Statistical analysis*

19 The statistical analyses will be performed by IBM SPSS Statistics for Windows, Version 22.0. (Armonk, NY: IBM  
20 Corp.).  
21  
22

23 Descriptive statistics will be produced for all study variables (mother's age, height, weight, parity, gestational age,  
24 mode and time of delivery, whether labor was spontaneous or induced, use of oxytocin or epidural anaesthesia,  
25 occiput position, progression angle, progression distance, head direction angle, head to perineum distance).  
26 Continuous variables will be presented as the mean and standard deviation (SD) or median, if appropriate.  
27 Categorical data will be presented as frequency and percentage.  
28  
29

30 Data will be first tested for normality and equal variance.  
31

32 Clinical obtained data from our study will be compared with similar data from other partograms. The results between  
33 groups (maternal, labor and neonatal characteristics of women assessed by classical clinical partograms or a more  
34 recent partogram and our sonopartogram) will be compared using Chi-square test or Fisher exact test (for  
35 categorical variables), and Student t-test or Mann Whitney test where applicable (for continuous variables) with a  
36 statistical significance level set at  $p < 0.05$ .  
37  
38

39 We will analyze the agreement between sonopartogram and clinical partogram in estimating fetal head position and  
40 fetal head station. For the fetal head position, we will assess the level of agreement between US and digital VE  
41 using Cohen's kappa statistics. Correlation coefficient (Pearson's correlation or the Spearman rank correlation or  
42 Kendall's rank correlation if appropriate) and linear regression will be employed for analyzing the strength of  
43 association between the fetal head station estimated by digital vaginal examination and the ultrasound parameters  
44 (HPD, PA, PD and HDA).  
45  
46

47 Pearson's correlation and regressions will be used for the evaluation of correlation between ultrasound parameters  
48 (PA, PD, HAD and HPD) and between US and time to delivery and digital vaginal examination (head station) for  
49 various clinical situations (nulliparous and multiparous, fetuses with OA and those with persistent OP position).  
50  
51

52 Reference ranges (90% range between 5th and 95th centiles) and the 95% confidence interval will be constructed  
53 for each ultrasound parameter and evolution in time will be display in graphic form separately for nulliparous and  
54 for multiparous. Predictive ability of each ultrasound parameters for vaginal delivery will be assessed by calculating  
55 sensitivity, specificity, positive predictive value, negative predictive value and likelihood ratio and by plotting  
56 receiver-operating characteristics (ROC) curve.  
57  
58  
59  
60

1  
2  
3 In order to identify factors that predict vaginal birth, for each subgroup population (nulliparous and multiparous) all  
4 analyses will use appropriate (that is, logistic or linear) regression models, with results presented as point estimates  
5 (odds ratios or difference in means), 95% confidence intervals and p values. Further secondary analyses will  
6 involve planned subgroup analyses and will use multivariable regression models. In all models, predictors (like  
7 maternal age, gestational age, clinically assessed cervical dilatation, maternal BMI) will be selected for inclusion in  
8 regression. We plan to include in our model covariates such as HPD, PA, PD, HDA and OP position. Based on the  
9 probabilities predicted by the logistic models, receiver operating characteristic (ROC) curves will be constructed  
10 and we will calculate and report the area under the curve, sensitivity and specificity rates with 95% confidence  
11 interval in predicting vaginal mode of delivery.  
12  
13  
14

15 The time from the ultrasound examination at the beginning of active phase of labor to vaginal delivery will be  
16 evaluated with Kaplan–Meier and Cox regression analysis. Data for women with Cesarean section will be censored.  
17 In the Cox regression analyses, fetal head position and fetal head station parameters will be tested as possible  
18 predictive factors. In additional analyses, we will adjust for maternal age, BMI, gestational age and parity as  
19 possible confounders.  
20  
21  
22

## 23 Reporting of adverse events

24 Prenatal ultrasonography appears to be a safe investigation method, as until today there has been no study  
25 reported suggesting otherwise (Statement approved by the International Society of Ultrasound in Obstetrics and  
26 Gynecology (ISUOG) Board in September 2011 and by the World Federation of Ultrasound in Medicine and Biology  
27 (WFUMB) Council in August 2011)<sup>46</sup>. US is routinely used in everyday clinical practice for assessment of neonates,  
28 including cranial and cerebral examination. However, US involves energy exposure and that requires further  
29 investigation.  
30  
31  
32

33 Regarding the perception of laboring women about US, there have been no reports in the literature of US causing  
34 discomfort.  
35

36 All adverse events reported spontaneously by patients or observed by the obstetricians will be recorded. When an  
37 adverse event occurs, the treating physician will take all necessary and appropriate measures to ensure the safety  
38 of the patient.  
39  
40

## 41 Ethical considerations and dissemination

### 42 Ethics approval and consent to participate

43 Ethics approval of the study protocol was obtained from the Ethics Committees of the universities in the three  
44 centres. The trial is registered in the ClinicalTrials.gov Registry: NCT02326077, approved by the University of  
45 Medicine and Pharmacy of Craiova Committee of Ethics and Academic and Scientific Deontology No:  
46 18/26.02.2016.  
47  
48  
49

#### 50 *Informed consent*

51 The US operator on duty will be responsible for explaining the procedure to the participants and for obtaining an  
52 informed written consent from all women accepting to take part in the study.  
53  
54

55 Regarding the unforeseen complications or health damage that may occur during or after labor, the management  
56 of labor and delivery is made exclusively based on the traditional clinical evaluation, by senior physicians. The US  
57 study protocol is only observational, without any obstruction for the clinical manoeuvres. The only potential  
58 sonographic intervention in the clinical assessment of labor is due to the ethical issues regarding the neonatal  
59  
60

1  
2  
3 outcome when instrumental delivery is attempted. Thus, the attending obstetrician will be informed in case of clinical  
4 and US discordance.  
5

6 On the other hand, it is made clear to all participants that US is considered safe in the third trimester and after birth,  
7 both for the mother and the baby.  
8

#### 9 10 *Compensation and insurance for harmed patients*

11 There will be no special financial compensation; however, any negligence on the part of the physician may be  
12 covered by the doctors' liability insurance.  
13

#### 14 15 *Declaration of interests*

16  
17 The investigators do not have any financial and other competing interests nor any relationships with companies  
18 that may have a financial interest in the information obtained during the study. All investigators comply with the  
19 policy on conflicts of interest in research and relevant conflict of interest guidelines.  
20

#### 21 **Availability of data and material (Dissemination)**

22  
23 The results of the study will be disseminated at national and international research conferences and as published  
24 articles in peer-reviewed journals. The study will be implemented and reported in line with the STROBE statement.  
25

26  
27 The anonymized collected data will be stored in the [www.zenodo.org](http://www.zenodo.org) research depository.  
28

#### 29 **Authors' contributions**

30  
31 IDG AP and TS conceived and designed the study and will supervise the study implementation. IDG drafted the  
32 protocol of the study. DL, DG, CML DR, PC, ZL, NM and TD revised and refined the study protocol for an optimal  
33 implementation and provided final approval of the version to be published. CML, BS and SR provided  
34 methodological and statistical expertise and will conduct the statistical analysis. IDG and DR drafted a PhD salary  
35 grant proposal for a previous approved pilot study. DG, DR, PC, ZL, NR, RD and FM will be responsible for study  
36 management, staff training and supervision and data centralization. IDG, AP and TD are the directors of the sites  
37 and they will provide clinical expertise and on-site management of the study. All authors critically reviewed and  
38 approved the final version of the manuscript.  
39  
40

#### 41 42 **Funding**

43  
44 The potential funding sources will play no role in data collection, analysis and interpretation, in the writing of the  
45 reports, or the decision to submit the paper for publication. A funded PhD project provided the resources for a  
46 previous pilot study. Currently, the study has no outside funding. The project will take place as part of PhD and  
47 postdoctoral studies, and we will use the opportunities to apply for future research funding.  
48  
49

#### 50 **Competing interests**

51  
52 The authors and their relations have no financial connections with companies that may have an interest in the  
53 submitted work, and no non-financial interests that may be relevant to the article.  
54

#### 55 **Acknowledgements**

56  
57 The authors would like to thank to our study sites for their support.  
58  
59  
60

### Current study status

The SonoLabor study recruited patients during January - December 2016 for a pilot study of 168 deliveries. Data analysis was completed in January 2017 and the results were communicated at the 27th World Congress on Ultrasound in Obstetrics and Gynecology<sup>33</sup>. Then the project was discontinued, due to the lack of resources.

Given the birth flow in the centres involved, the sample size required, the acceptability previously recorded and the disponible sonographers for intrapartum US evaluations, we should expect that the study should be completed during a two-years period of time.

### References

1. Sherer DM, Miodovnik M, Bradley KS, Langer O. Intrapartum fetal head position I: comparison between transvaginal digital examination and transabdominal ultrasound assessment during the active stage of labor. *Ultrasound Obstet Gynecol.* 2002;19(3):258-63.
2. Kreiser D, Schiff E, Lipitz S, Kayam Z, Avraham A, Achiron R. Determination of fetal occiput position by ultrasound during the second stage of labor. *J Matern Fetal Med.* 2001;10(4):283-6.
3. Sherer DM, Miodovnik M, Bradley KS, Langer O. Intrapartum fetal head position II: comparison between transvaginal digital examination and transabdominal ultrasound assessment during the second stage of labor. *Ultrasound Obstet Gynecol.* 2002;19(3):264-8.
4. Akmal S, Tsoi E, Kametas N, Howard R, Nicolaides KH. Intrapartum sonography to determine fetal head position. *J Matern Fetal Neonatal Med.* 2002;12(3):172-7.
5. Chou MR, Kreiser D, Taslimi MM, Druzin ML, El-Sayed YY. Vaginal versus ultrasound examination of fetal occiput position during the second stage of labor. *Am J Obstet Gynecol.* 2004;191(2):521-4.
6. Dupuis O, Ruimark S, Corinne D, Simone T, André D, René-Charles R. Fetal head position during the second stage of labor: comparison of digital vaginal examination and transabdominal ultrasonographic examination. *Eur J Obstet Gynecol Reprod Biol.* 2005, 1;123(2):193-7.
7. Oláh KS. Reversal of the decision for caesarean section in the second stage of labor on the basis of consultant vaginal assessment. *J Obstet Gynaecol.* 2005;25(2):115-6.
8. Akmal S, Tsoi E, Nicolaides KH. Intrapartum sonography to determine fetal occipital position: interobserver agreement. *Ultrasound Obstet Gynecol.* 2004;24(4):421-4.
9. Buchmann E, Libhaber E. Interobserver agreement in intrapartum estimation of fetal head station. *Int J Gynaecol Obstet.* 2008;101(3):285-9.
10. Dupuis O, Silveira R, Zentner A, Dittmar A, Gaucherand P, Cucherat M, Redarce T, Rudigoz RC. Birth simulator: reliability of transvaginal assessment of fetal head station as defined by the American College of Obstetricians and Gynecologists classification. *Am J Obstet Gynecol.* 2005;192(3):868-74.
11. Nizard J, Haberman S, Paltieli Y, Gonen R, Ohel G, Le Bourthe Y, Ville Y. Determination of fetal head station and position during labor: a new technique that combines ultrasound and a position-tracking system. *Am J Obstet Gynecol.* 2009;200(4):404.e1-5.
12. Molina FS, Terra R, Carrillo MP, Puertas A, Nicolaides KH. What is the most reliable ultrasound parameter for assessment of fetal head descent? *Ultrasound Obstet Gynecol.* 2010;36(4):493-9.
13. Tutschek B, Torkildsen EA, Eggebø TM. Comparison between ultrasound parameters and clinical examination to assess fetal head station in labor. *Ultrasound Obstet Gynecol.* 2013;41(4):425-9.
14. Rayburn WF, Siemers KH, Legino LJ, Nability MR, Anderson JC, Patil KD. Dystocia in late labor: determining fetal position by clinical and ultrasonic techniques. *Am J Perinatol.* 1989;6(3):316-9.

15. Souka AP, Haritos T, Basayiannis K, Noikokyri N, Antsaklis A. Intrapartum ultrasound for the examination of the fetal head position in normal and obstructed labor. *J Matern Fetal Neonatal Med.* 2003;13(1):59-63.
16. Sherer DM, Abulafia O. Intrapartum assessment of fetal head engagement: comparison between transvaginal digital and transabdominal ultrasound determinations. *Ultrasound Obstet Gynecol.* 2003;21(5):430-6.
17. Akmal S, Kametas N, Tsoi E, Hargreaves C, Nicolaides KH. Comparison of transvaginal digital examination with intrapartum sonography to determine fetal head position before instrumental delivery. *Ultrasound Obstet Gynecol.* 2003;21(5):437-40.
18. Wong GY, Mok YM, Wong SF. Transabdominal ultrasound assessment of the fetal head and the accuracy of vacuum cup application. *Int J Gynaecol Obstet.* 2007;98(2):120-3.
19. Barbera AF, Imani F, Becker T, Lezotte DC, Hobbins JC. Anatomic relationship between the pubic symphysis and ischial spines and its clinical significance in the assessment of fetal head engagement and station during labor. *Ultrasound Obstet Gynecol.* 2009;33(3):320-5.
20. Ramphul M, Ooi PV, Burke G, Kennelly MM, Said SA, Montgomery AA, Murphy DJ. Instrumental delivery and ultrasound: a multicentre randomised controlled trial of ultrasound assessment of the fetal head position versus standard care as an approach to prevent morbidity at instrumental delivery. *BJOG.* 2014 Jul;121(8):1029-38.
21. Ramphul M, Kennelly M, Murphy DJ. Establishing the accuracy and acceptability of abdominal ultrasound to define the foetal head position in the second stage of labour: a validation study. *Eur J Obstet Gynecol Reprod Biol.* 2012 Sep;164(1):35-9.
22. Dietz HP, Lanzarone V. Measuring engagement of the fetal head: validity and reproducibility of a new ultrasound technique. *Ultrasound Obstet Gynecol.* 2005;25(2):165-8.
23. Henrich W, Dudenhausen J, Fuchs I, Kämena A, Tutschek B. Intrapartum translabial ultrasound (ITU): sonographic landmarks and correlation with successful vacuum extraction. *Ultrasound Obstet Gynecol.* 2006;28(6):753-60.
24. Iliescu DG, Adam G, Tudorache S, Antsaklis P, Cernea N. Quantification of fetal head direction using transperineal ultrasound: an easier approach. *Ultrasound Obstet Gynecol.* 2012 Nov;40(5):607-8.
25. Ghi T, Farina A, Pedrazzi A, Rizzo N, Pelusi G, Pilu G. Diagnosis of station and rotation of the fetal head in the second stage of labor with intrapartum translabial ultrasound. *Ultrasound Obstet Gynecol.* 2009;33(3):331-6.
26. Barbera AF, Pombar X, Perugino G, Lezotte DC, Hobbins JC. A new method to assess fetal head descent in labor with transperineal ultrasound. *Ultrasound Obstet Gynecol.* 2009;33(3):313-9.
27. Kalache KD, Dückelmann AM, Michaelis SA, Lange J, Cichon G, Dudenhausen JW. Transperineal ultrasound imaging in prolonged second stage of labor with occipitoanterior presenting fetuses: how well does the 'angle of progression' predict the mode of delivery? *Ultrasound Obstet Gynecol.* 2009;33(3):326-30.
28. Youssef A, Maroni E, Ragusa A, De Musso F, Salsi G, Iammarino MT, Paccapelo A, Rizzo N, Pilu G, Ghi T. Fetal head-symphysis distance: a simple and reliable ultrasound index of fetal head station in labor. *Ultrasound Obstet Gynecol.* 2013;41(4):419-24.
29. Torkildsen EA, Salvesen KÅ, Eggebø TM. Prediction of delivery mode with transperineal ultrasound in women with prolonged first stage of labor. *Ultrasound Obstet Gynecol.* 2011;37(6):702-8.
30. Eggebø TM, Hassan WA, Salvesen KÅ, Lindtjørn E, Lees CC. Sonographic prediction of vaginal delivery in prolonged labor: a two-center study. *Ultrasound Obstet Gynecol.* 2014;43(2):195-201.

- 1
- 2
- 3 31. Eggebø TM, Økland I, Heien C, Gjessing LK, Romundstad P, Salvesen KA. Can ultrasound
- 4 measurements replace digitally assessed elements of the Bishop score? *Acta Obstet Gynecol Scand.*
- 5 2009;88(3):325-31.
- 6
- 7
- 8 32. Iliescu D, Antsaklis P, Paulescu D, Comanescu A, Tudorache S, Antsaklis A, Ceausu I, Novac L, Cernea
- 9 N, Kurjak A. Applications of ultrasound in prelabor and labor. *Donald School J Obstet Gynecol*, 2012, 6(3):
- 10 257-269
- 11
- 12 33. Iliescu DG, Tudorache S, Cernea N, Florea M, Capitanescu R, Novac M, Stoean R, Stoean C, Antsaklis
- 13 P, Carbutaru O, Dragusin R. P13.03: Correlations of the sonopartogram with classic clinical partogram
- 14 and key points from a pilot study, *Ultrasound in Obstetrics & Gynecology* 2017; 50 (Suppl. 1):194-195
- 15
- 16 34. Hassan WA, Eggebø T, Ferguson M, Gillett A, Studd J, Pasupathy D, Lees CC. The sonopartogram: a
- 17 novel method for recording progress of labor by ultrasound. *Ultrasound Obstet Gynecol.* 2014;43(2):189-
- 18 94.
- 19
- 20 35. Eggebø TM. Ultrasound is the future diagnostic tool in active labor. *Ultrasound Obstet Gynecol.*
- 21 2013;41(4):361-3.
- 22
- 23 36. Ghi T, Maroni E, Youssef A, Morselli-Labate AM, Paccapelo A, Montaguti E, Rizzo N, Pilu G.
- 24 Sonographic pattern of fetal head descent: relationship with duration of active second stage of labor and
- 25 occiput position at delivery. *Ultrasound Obstet Gynecol.* 2014 Jul;44(1):82-9.
- 26
- 27 37. Friedman EA. Primigravid labor; a graphicostatistical analysis. *Obstet Gynecol.* 1955 Dec;6(6):567-89.
- 28
- 29 38. Friedman EA. The graphic analysis of labor. *Am J Obstet Gynecol.* 1954; 68:1568-75
- 30
- 31 39. Zhang J, Troendle JF, Yancey MK. Reassessing the Labor Curve in Nulliparous Women. *American*
- 32 *Journal of Obstetrics and Gynecology.* 2002;187(4):824-828.
- 33
- 34 40. Acceptability of Intrapartum Ultrasound Monitoring- Experience from a Romanian Longitudinal Study. D.G.
- 35 Iliescu, S Tudorache, M.L. Cara, R. Dragusin, O. Carbutaru, M. Florea,C. Patru, L. Zorila, N.A.
- 36 Dragoescu, L. Novac, N. Cernea. *Current Health Sciences Journal*, Volume 41 Issue 4 2015, 355-360.
- 37
- 38 41. National Institute for Health and Care Excellence. Intrapartum care for healthy women and babies. London
- 39 (UK): NICE; Published December 2014, Last updated: February 2017.
- 40 <https://www.nice.org.uk/guidance/cg190>
- 41
- 42 42. Murphy DJ, Burke G, Montgomery AA, Ramphul M; IDUS Study Group. Study protocol. IDUS -
- 43 Instrumental delivery & ultrasound. A multi-centre randomised controlled trial of ultrasound assessment
- 44 of the fetal head position versus standard care as an approach to prevent morbidity
- 45 at instrumental delivery. *BMC Pregnancy Childbirth.* 2012 Sep 13;12:95.
- 46
- 47 43. Eggebø TM, Gjessing LK, Heien C, Smedvig E, Økland I, Romundstad P, Salvesen KA. Prediction of
- 48 labor and delivery by transperineal ultrasound in pregnancies with prelabor rupture of membranes at term.
- 49 *Ultrasound Obstet Gynecol.* 2006;27(4):387-91.
- 50
- 51 44. Tutschek B, Braun T, Chantraine F, Henrich W. A study of progress of labor using intrapartum translabial
- 52 ultrasound, assessing head station, direction, and angle of descent. *BJOG.* 2011 Jan;118(1):62-9.
- 53
- 54 45. Altman, D.G., *Practical statistics for medical research*, Chapman and Hall, 1991.
- 55
- 56 46. Bioeffects and Safety Committee, Salvesen K, Lees C, Abramowicz J, Brezinka C, Ter Haar G, Maršál K;
- 57 Board of the International Society of Ultrasound in Obstetrics and Gynecology (ISUOG). ISUOG-WFUMB
- 58 statement on the non-medical use of ultrasound, 2011. *Ultrasound Obstet Gynecol.* 2011 Nov;38(5):608.
- 59
- 60

1  
2  
3  
4  
5  
6  
7  
8  
9  
10  
11  
12  
13  
14  
15  
16  
17  
18  
19  
20  
21  
22  
23  
24  
25  
26  
27  
28  
29  
30  
31  
32  
33  
34  
35  
36  
37  
38  
39  
40  
41  
42  
43  
44  
45  
46  
47  
48  
49  
50  
51  
52  
53  
54  
55  
56  
57  
58  
59  
60

Figure 1. Implementation of the SONOLABOR study.

Figure 2. Ultrasound determination of the occiput position in the first stage of labor.

A: Example of the probe orientation in the transabdominal suprapubic transverse plane. B: FHPo determination in the plane described in image A, based on the identification of cranium or cerebral structures: occiput (Oc), thalamus (T), interhemispheric septum (S), orbits (O). OA, occiput anterior; OP, occiput posterior, LOT, left occiput transverse; ROT, right occiput transverse; LOA left occiput anterior; ROA right occiput anterior; LOP, left occiput posterior; ROP, right occiput posterior.

Figure 3. Ultrasound determination of the occiput position in the second stage of labor.

A: Example of the probe orientation in the transperineal infrapubic transverse plane. B: Schematization of the structures visualized and the measurement of the midline angle between the midline (falx cerebri) and the anteroposterior axis of the maternal pelvis. C-H: Presentation of an example with midline angle measurement and evolution during anterior rotation of a transverse occiput. Occiput position is identified based on the visualization of the cerebral midline (interhemispheric septum, S) and choroid plexus (Px) direction (divergent posteriorly), or thalami aspect (triangular, with the base anteriorly). Midline angle gradually decreases during the anterior occiput rotation from the transverse position (C,D), as it reaches right anterior (E,F) and anterior (infrapubic) (G,H) positions.

Figure 4. Ultrasound determination of the fetal head descent/progression (FHPr). Placement of the transducer in the infrapubic translabial sagittal plane (A) and infrapubic transverse plane (B). C: measurement of the progression angle between the long axis of the pubic symphysis and a line extending from its most inferior portion tangentially to the fetal skull. D: measurement of the direction angle as the angle between the major longitudinal axis of the fetal head (perpendicular to the biparietal diameter) and the infrapubic line. E: measurement of the progression distance as the minimal distance between the infrapubic line and the leading part of the fetal skull (star). F: measurement of the head to perineum distance as the shortest distance from the skin surface of the perineum to the outer bony limit of the fetal skull.

Figure 5. A,B: Presentation of caput (star) in transperineal transverse (A) and sagittal evaluation (B). C: Molding of the cranium bones indicated with the arrow.

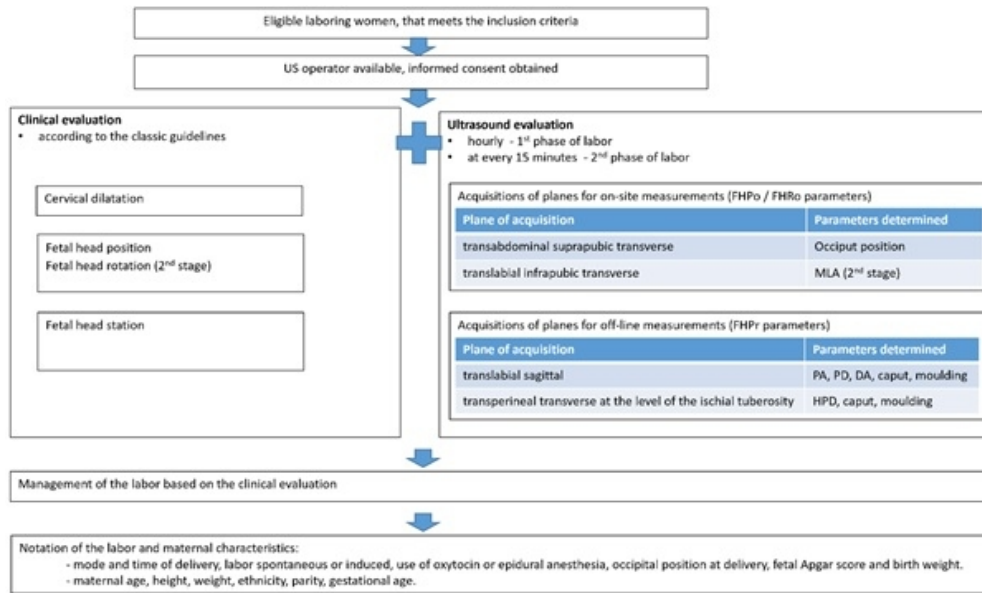

Implementation of the SONOLABOR study.

51x31mm (300 x 300 DPI)



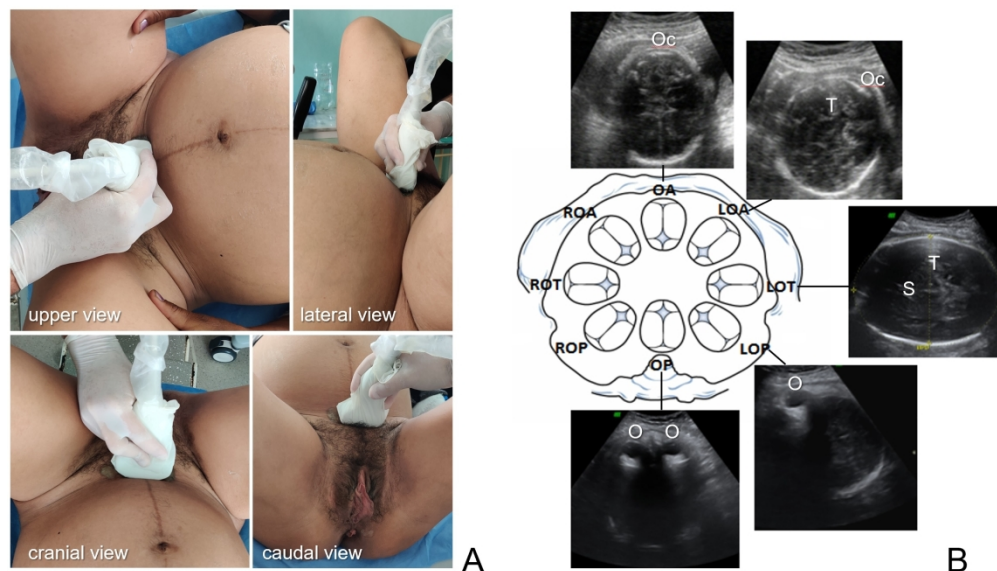

Figure 2. Ultrasound determination of the occiput position in the first stage of labor. A: Example of the probe orientation in the transabdominal suprapubic transverse plane. B: FHPo determination in the plane described in image A, based on the identification of cranium or cerebral structures: occiput (Oc), thalamus (T), interhemispheric septum (S), orbits (O). OA, occiput anterior; OP, occiput posterior, LOT, left occiput transverse; ROT, right occiput transverse; LOA left occiput anterior; ROA right occiput anterior; LOP, left occiput posterior; ROP, right occiput posterior.

207x118mm (300 x 300 DPI)

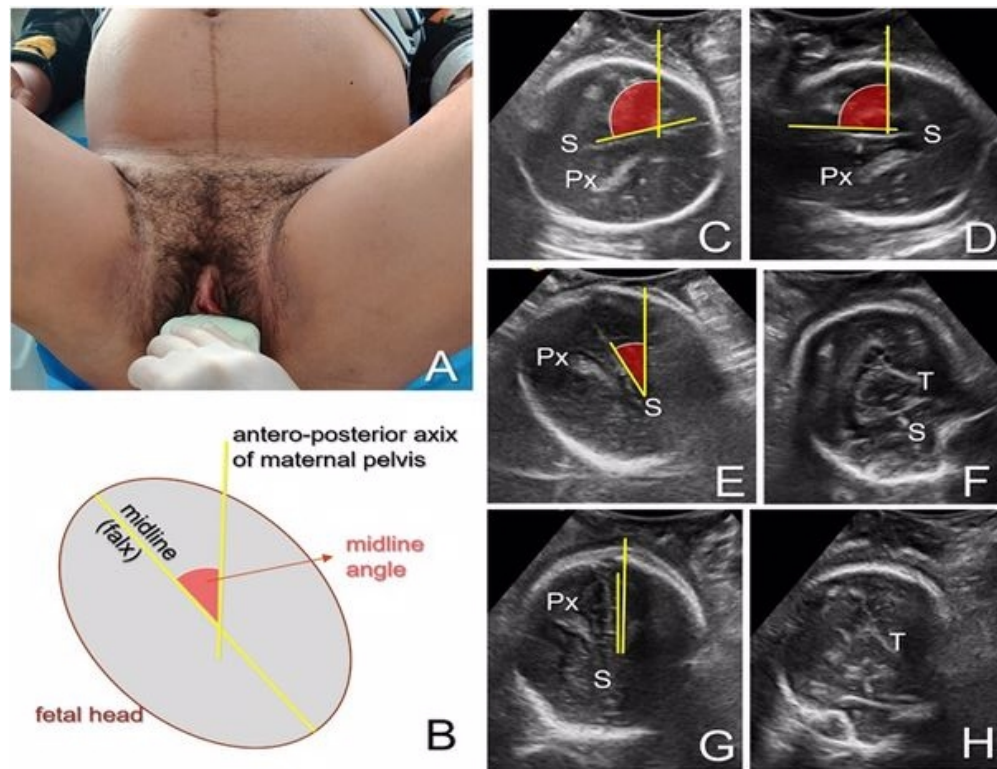

Figure 3. Ultrasound determination of the occiput position in the second stage of labor. A: Example of the probe orientation in the transperineal infrapubic transverse plane. B: Schematization of the structures visualized and the measurement of the midline angle between the midline (falx cerebri) and the anteroposterior axis of the maternal pelvis. C-H: Presentation of an example with midline angle measurement and evolution during anterior rotation of a transverse occiput. Occiput position is identified based on the visualization of the cerebral midline (interhemispheric septum, S) and choroid plexus (Px) direction (divergent posteriorly), or thalami aspect (triangular, with the base anteriorly). Midline angle gradually decreases during the anterior occiput rotation from the transverse position (C,D), as it reaches right anterior (E,F) and anterior (infrapubic) (G,H) positions.

51x39mm (300 x 300 DPI)

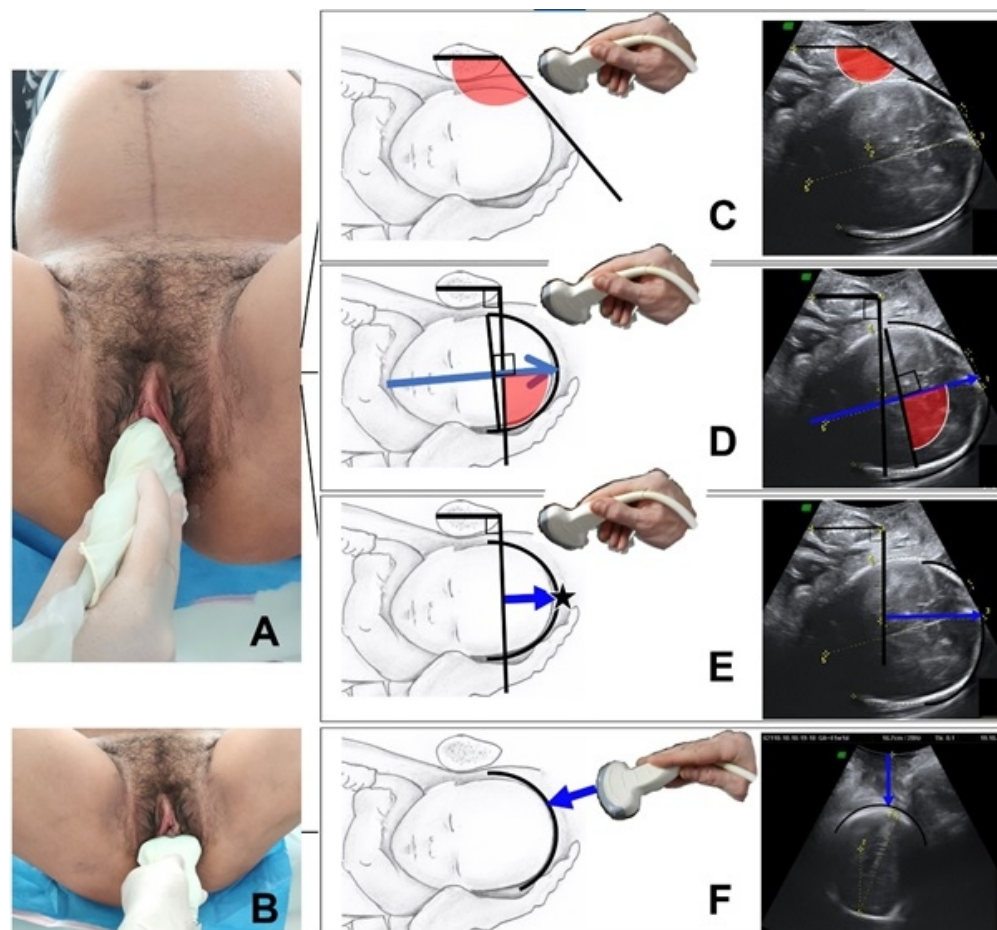

Figure 4. Ultrasound determination of the fetal head descent/progression (FHP). Placement of the transducer in the infrapubic translabial sagittal plane (A) and infrapubic transverse plane (B). C: measurement of the progression angle between the long axis of the pubic symphysis and a line extending from its most inferior portion tangentially to the fetal skull. D: measurement of the direction angle as the angle between the major longitudinal axis of the fetal head (perpendicular to the biparietal diameter) and the infrapubic line. E: measurement of the progression distance as the minimal distance between the infrapubic line and the leading part of the fetal skull (star). F: measurement of the head to perineum distance as the shortest distance from the skin surface of the perineum to the outer bony limit of the fetal skull.

50x47mm (300 x 300 DPI)

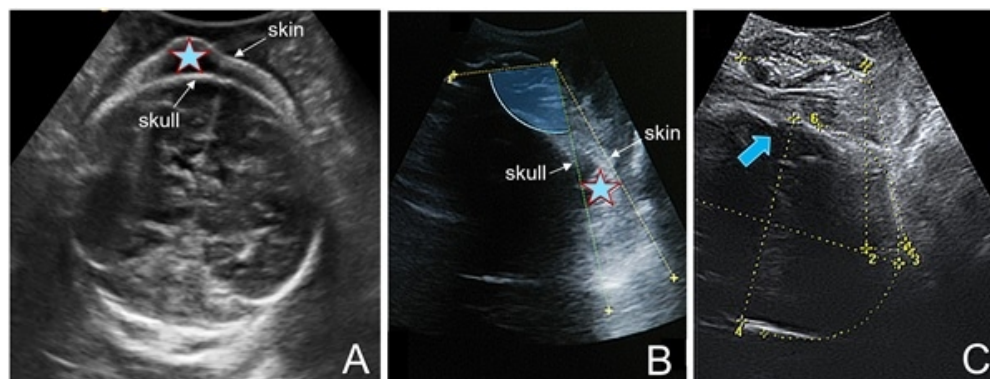

Figure 5. A,B: Presentation of caput (star) in transperineal transverse (A) and sagittal evaluation (B). C: Molding of the cranium bones indicated with the arrow.

50x19mm (300 x 300 DPI)
